# Supplementary material for: Temporal Trends in HIV-1 Mutations Used for the Surveillance of Transmitted Drug Resistance
Source: MDPI journal article supplement (doi:10.3390/v13050879), 2021-05-11
Supplement: s1 [file s1]

**Table S1.** List of 113 PI-associated mutations included in one or more of four expert 2020 lists: prevalence in PI-naïve and PI-experienced persons before and after 2009.

| Pos <sup>1</sup> | AA <sup>1</sup> | Lists           |              | <2009 |      |                 |               |              |               |               |              |            |              |                  | ≥2009           |              |                 |               |               |                |               |            |            |              |                  |     |  |
|------------------|-----------------|-----------------|--------------|-------|------|-----------------|---------------|--------------|---------------|---------------|--------------|------------|--------------|------------------|-----------------|--------------|-----------------|---------------|---------------|----------------|---------------|------------|------------|--------------|------------------|-----|--|
|                  |                 |                 |              | 2009  | 2020 | %PI<br>(22,266) | %PI-Naive     |              |               |               |              |            |              |                  |                 |              | %PI<br>(10,534) | %PI-Naive     |               |                |               |            |            |              |                  |     |  |
|                  |                 | ALL<br>(61,067) | A<br>(4,316) |       |      |                 | B<br>(33,132) | C<br>(8,935) | 01<br>(5,265) | 02<br>(3,743) | D<br>(1,497) | F<br>(726) | G<br>(2,036) | Other<br>(1,438) | ALL<br>(54,813) | A<br>(3,209) |                 | B<br>(21,435) | C<br>(10,194) | 01<br>(10,189) | 02<br>(3,616) | D<br>(891) | F<br>(794) | G<br>(1,425) | Other<br>(3,039) |     |  |
|                  |                 |                 |              |       |      |                 |               |              |               |               |              |            |              |                  |                 |              |                 |               |               |                |               |            |            |              |                  |     |  |
| 10               | C               | 1               | 1            | 0.0   | 0.0  | 0.0             | 0.0           | 0.0          | 0.0           | 0.0           | 0.0          | 0.0        | 0.0          | 0.0              | 0.0             | 0.0          | 0.0             | 0.0           | 0.0           | 0.0            | 0.0           | 0.0        | 0.0        | 0.0          | 0.0              | 0.0 |  |
| 10               | F               | 4               | 4            | 8.6   | 0.2  | 0.1             | 0.3           | 0.1          | 0.1           | 0.0           | 0.3          | 0.0        | 0.1          | 0.5              | 6.7             | 0.2          | 0.2             | 0.3           | 0.1           | 0.2            | 0.1           | 0.5        | 0.0        | 0.0          | 0.0              | 0.0 |  |
| 10               | I               | 4               | 3            | 31    | 8.5  | 14              | 8.9           | 2.3          | 10            | 6.0           | 6.1          | 9.1        | 11           | 26               | 16              | 8.4          | 20              | 9.2           | 2.2           | 7.7            | 7.7           | 6.6        | 10         | 19           | 15               | 15  |  |
| 10               | M               | 1               | 1            | 0.2   | 0.3  | 0.6             | 0.0           | 0.8          | 0.3           | 0.1           | 0.2          | 0.1        | 1.5          | 1.4              | 0.3             | 0.5          | 0.8             | 0.2           | 1.2           | 0.2            | 0.5           | 0.0        | 0.3        | 2.5          | 2.0              | 2.0 |  |
| 10               | R               | 3               | 1            | 0.4   | 0.0  | 0.0             | 0.0           | 0.0          | 0.0           | 0.0           | 0.0          | 0.0        | 0.0          | 0.0              | 0.2             | 0.0          | 0.0             | 0.0           | 0.0           | 0.0            | 0.0           | 0.0        | 0.0        | 0.0          | 0.0              | 0.0 |  |
| 10               | V               | 4               | 3            | 11    | 4.8  | 8.5             | 3.4           | 1.8          | 5.9           | 11            | 8.1          | 33         | 0.5          | 7.6              | 11              | 5.9          | 12              | 4.4           | 1.7           | 5.9            | 12            | 8.6        | 50         | 1.6          | 4.8              | 4.8 |  |
| 11               | I               | 4               | 4            | 3.0   | 0.6  | 0.5             | 0.3           | 0.5          | 0.5           | 3.3           | 0.5          | 0.0        | 1.1          | 1.4              | 1.4             | 0.8          | 1.1             | 0.3           | 0.5           | 0.6            | 4.6           | 0.2        | 0.6        | 1.6          | 0.3              | 0.3 |  |
| 11               | L               | 1               | 1            | 0.7   | 0.0  | 0.0             | 0.0           | 0.1          | 0.0           | 0.0           | 0.1          | 0.0        | 0.0          | 0.0              | 0.2             | 0.0          | 0.2             | 0.0           | 0.0           | 0.0            | 0.0           | 0.1        | 0.0        | 0.1          | 0.0              | 0.0 |  |
| 15               | A               | 1               | 1            | 0.0   | 0.0  | 0.0             | 0.0           | 0.0          | 0.0           | 0.0           | 0.0          | 0.0        | 0.0          | 0.0              | 0.0             | 0.0          | 0.0             | 0.0           | 0.0           | 0.0            | 0.0           | 0.0        | 0.0        | 0.0          | 0.1              | 0.1 |  |
| 15               | V               | 1               | 1            | 33    | 28   | 15              | 22            | 85           | 12            | 10            | 17           | 75         | 17           | 32               | 41              | 33           | 19              | 25            | 81            | 14             | 16            | 18         | 60         | 22           | 25               | 25  |  |
| 16               | E               | 3               | 1            | 6.2   | 9.4  | 20              | 4.2           | 7.2          | 25            | 23            | 9.0          | 26         | 4.5          | 16               | 13              | 14           | 24              | 6.2           | 9.1           | 26             | 31            | 9.8        | 30         | 6.0          | 19               | 19  |  |
| 20               | I               | 4               | 2            | 8.4   | 9.9  | 2.7             | 0.1           | 0.1          | 2.7           | 95            | 0.7          | 0.4        | 98           | 8.9              | 6.2             | 11           | 5.4             | 0.2           | 0.1           | 1.9            | 95            | 2.4        | 3.1        | 97           | 9.8              | 9.8 |  |
| 20               | M               | 4               | 3            | 3.3   | 0.5  | 0.1             | 0.4           | 0.6          | 0.1           | 0.6           | 1.3          | 1.3        | 0.9          | 1.8              | 1.7             | 0.5          | 0.1             | 0.6           | 0.6           | 0.0            | 0.5           | 2.7        | 2.3        | 0.6          | 1.1              | 1.1 |  |
| 20               | R               | 4               | 3            | 17    | 8.2  | 17              | 2.8           | 19           | 16            | 1.7           | 12           | 43         | 0.0          | 18               | 18              | 13           | 20              | 3.0           | 22            | 27             | 2.3           | 13         | 31         | 0.4          | 11               | 11  |  |
| 20               | T               | 4               | 3            | 5.3   | 0.1  | 0.1             | 0.1           | 0.1          | 0.1           | 0.1           | 0.2          | 0.0        | 0.0          | 0.8              | 4.1             | 0.1          | 0.0             | 0.1           | 0.1           | 0.2            | 0.1           | 0.1        | 0.0        | 0.0          | 0.0              | 0.0 |  |
| 20               | V               | 3               | 2            | 1.1   | 0.1  | 0.0             | 0.0           | 0.0          | 0.0           | 1.5           | 0.2          | 0.0        | 0.6          | 0.2              | 0.5             | 0.1          | 0.1             | 0.0           | 0.0           | 0.0            | 1.4           | 0.0        | 0.0        | 0.9          | 0.5              | 0.5 |  |
| 23               | I               | 2               | 2            | 1.3   | 0.0  | 0.2             | 0.0           | 0.0          | 0.0           | 0.0           | 0.1          | 0.0        | 0.0          | 0.0              | 1.1             | 0.0          | 0.0             | 0.0           | 0.0           | 0.0            | 0.0           | 0.0        | 0.0        | 0.0          | 0.0              | 0.0 |  |
| 24               | F               | 2               | 1            | 0.6   | 0.0  | 0.1             | 0.0           | 0.1          | 0.0           | 0.0           | 0.1          | 0.0        | 0.0          | 0.0              | 0.3             | 0.0          | 0.0             | 0.0           | 0.0           | 0.0            | 0.0           | 0.1        | 0.0        | 0.0          | 0.0              | 0.0 |  |
| 24               | I               | 4               | 4            | 5.6   | 0.0  | 0.0             | 0.0           | 0.0          | 0.0           | 0.0           | 0.1          | 0.0        | 0.0          | 0.0              | 2.5             | 0.0          | 0.0             | 0.0           | 0.0           | 0.0            | 0.0           | 0.0        | 0.0        | 0.0          | 0.0              | 0.0 |  |
| 24               | M               | 0               | 1            | 0.1   | 0.0  | 0.0             | 0.0           | 0.0          | 0.0           | 0.0           | 0.0          | 0.0        | 0.0          | 0.0              | 0.1             | 0.0          | 0.0             | 0.0           | 0.0           | 0.0            | 0.0           | 0.0        | 0.0        | 0.0          | 0.0              | 0.0 |  |
| 30               | N               | 4               | 4            | 6.2   | 0.0  | 0.0             | 0.0           | 0.0          | 0.0           | 0.0           | 0.0          | 0.0        | 0.0          | 0.0              | 2.4             | 0.0          | 0.0             | 0.0           | 0.0           | 0.0            | 0.0           | 0.0        | 0.0        | 0.0          | 0.0              | 0.0 |  |
| 32               | I               | 4               | 4            | 5.0   | 0.0  | 0.0             | 0.0           | 0.0          | 0.0           | 0.0           | 0.0          | 0.0        | 0.0          | 0.0              | 2.5             | 0.0          | 0.0             | 0.0           | 0.0           | 0.0            | 0.0           | 0.0        | 0.0        | 0.1          | 0.0              | 0.0 |  |
| 32               | ins             | 1               | 1            | 0.0   | 0.0  | 0.0             | 0.0           | 0.0          | 0.0           | 0.0           | 0.0          | 0.0        | 0.0          | 0.0              | 0.0             | 0.0          | 0.0             | 0.0           | 0.0           | 0.0            | 0.0           | 0.0        | 0.0        | 0.0          | 0.0              | 0.0 |  |
| 33               | F               | 4               | 4            | 12    | 0.4  | 1.0             | 0.2           | 0.1          | 1.4           | 0.4           | 0.7          | 0.0        | 0.4          | 0.5              | 6.9             | 0.5          | 1.6             | 0.1           | 0.2           | 1.2            | 0.6           | 0.4        | 0.3        | 0.2          | 0.7              | 0.7 |  |
| 33               | I               | 4               | 3            | 2.2   | 0.6  | 0.3             | 1.0           | 0.0          | 0.2           | 0.2           | 1.4          | 0.1        | 0.2          | 0.6              | 1.7             | 0.7          | 0.8             | 1.4           | 0.0           | 0.1            | 0.2           | 0.9        | 0.6        | 0.2          | 0.6              | 0.6 |  |
| 33               | V               | 4               | 2            | 1.8   | 1.7  | 0.5             | 2.6           | 0.1          | 0.5           | 0.2           | 7.0          | 0.6        | 0.3          | 0.8              | 1.4             | 1.3          | 0.7             | 2.6           | 0.3           | 0.3            | 0.4           | 6.4        | 1.0        | 0.1          | 0.8              | 0.8 |  |
| 34               | Q               | 1               | 1            | 2.6   | 0.1  | 0.0             | 0.0           | 0.0          | 0.0           | 0.5           | 0.0          | 0.0        | 0.7          | 0.0              | 1.3             | 0.1          | 0.0             | 0.0           | 0.0           | 0.0            | 0.7           | 0.0        | 0.0        | 0.4          | 0.3              | 0.3 |  |
| 35               | G               | 3               | 1            | 1.1   | 0.2  | 0.1             | 0.1           | 0.1          | 0.1           | 1.5           | 0.1          | 0.1        | 0.3          | 1.2              | 0.7             | 0.2          | 0.1             | 0.1           | 0.1           | 0.1            | 1.4           | 0.2        | 0.0        | 0.4          | 0.7              | 0.7 |  |
| 35               | N               | 1               | 1            | 1.6   | 0.6  | 1.0             | 0.1           | 0.2          | 1.7           | 2.6           | 0.3          | 0.7        | 2.9          | 0.3              | 1.9             | 1.0          | 3.0             | 0.1           | 0.3           | 1.1            | 3.8           | 1.9        | 0.9        | 3.1          | 1.5              | 1.5 |  |
| 36               | I               | 4               | 2            | 49    | 51   | 98              | 17            | 84           | 97            | 97            | 63           | 97         | 98           | 79               | 62              | 62           | 97              | 18            | 85            | 97             | 97            | 71         | 96         | 98           | 69               | 69  |  |

|    |   |   |   |     |     |     |     |     |     |     |     |     |     |     |     |     |     |     |     |     |     |     |     |     |     |
|----|---|---|---|-----|-----|-----|-----|-----|-----|-----|-----|-----|-----|-----|-----|-----|-----|-----|-----|-----|-----|-----|-----|-----|-----|
| 36 | L | 3 | 2 | 2.6 | 1.3 | 0.4 | 1.0 | 3.6 | 0.3 | 0.9 | 2.5 | 0.7 | 0.3 | 1.8 | 2.5 | 1.4 | 0.6 | 1.2 | 3.6 | 0.2 | 0.8 | 1.3 | 0.8 | 0.5 | 1.0 |
| 36 | V | 3 | 2 | 2.1 | 1.0 | 0.4 | 0.4 | 4.7 | 0.6 | 0.2 | 0.5 | 0.1 | 0.2 | 1.2 | 1.4 | 1.1 | 0.2 | 0.4 | 3.4 | 0.4 | 0.3 | 0.6 | 0.8 | 0.1 | 2.7 |
| 38 | W | 1 | 1 | 0.2 | 0.0 | 0.0 | 0.0 | 0.0 | 0.0 | 0.0 | 0.0 | 0.1 | 0.0 | 0.0 | 0.1 | 0.0 | 0.0 | 0.0 | 0.0 | 0.0 | 0.0 | 0.0 | 0.0 | 0.0 | 0.0 |
| 41 | T | 1 | 1 | 0.1 | 0.0 | 0.0 | 0.0 | 0.1 | 0.0 | 0.1 | 0.1 | 0.0 | 0.1 | 0.3 | 0.1 | 0.0 | 0.0 | 0.0 | 0.1 | 0.0 | 0.2 | 0.0 | 0.0 | 0.0 | 0.1 |
| 43 | R | 1 | 1 | 2.4 | 2.7 | 1.4 | 3.0 | 1.3 | 2.4 | 5.6 | 1.6 | 3.7 | 3.1 | 5.0 | 3.0 | 3.2 | 2.7 | 3.4 | 1.3 | 2.7 | 7.8 | 4.5 | 2.3 | 4.1 | 3.9 |
| 43 | T | 3 | 3 | 5.6 | 0.1 | 0.1 | 0.1 | 0.1 | 0.0 | 0.2 | 0.1 | 0.1 | 0.1 | 1.2 | 3.0 | 0.1 | 0.1 | 0.1 | 0.1 | 0.0 | 0.2 | 0.0 | 0.0 | 0.0 | 0.4 |
| 46 | I | 4 | 4 | 21  | 0.3 | 0.3 | 0.3 | 0.2 | 0.3 | 0.2 | 0.1 | 0.0 | 0.0 | 0.2 | 13  | 0.3 | 0.3 | 0.4 | 0.1 | 0.6 | 0.2 | 0.1 | 0.4 | 0.2 | 0.0 |
| 46 | L | 4 | 4 | 9.2 | 0.3 | 0.3 | 0.4 | 0.1 | 0.3 | 0.1 | 0.2 | 0.1 | 0.4 | 0.3 | 3.4 | 0.4 | 0.2 | 0.3 | 0.1 | 0.9 | 0.1 | 0.0 | 0.4 | 0.0 | 0.6 |
| 46 | V | 1 | 1 | 0.5 | 0.0 | 0.0 | 0.0 | 0.1 | 0.1 | 0.1 | 0.0 | 0.0 | 0.0 | 0.0 | 0.4 | 0.1 | 0.0 | 0.1 | 0.0 | 0.1 | 0.1 | 0.0 | 0.1 | 0.0 | 0.1 |
| 47 | A | 4 | 4 | 0.4 | 0.0 | 0.0 | 0.0 | 0.0 | 0.0 | 0.0 | 0.0 | 0.0 | 0.0 | 0.0 | 1.0 | 0.0 | 0.0 | 0.0 | 0.0 | 0.0 | 0.0 | 0.0 | 0.0 | 0.0 | 0.0 |
| 47 | V | 4 | 4 | 4.5 | 0.0 | 0.0 | 0.0 | 0.0 | 0.0 | 0.1 | 0.0 | 0.0 | 0.1 | 0.0 | 2.0 | 0.0 | 0.0 | 0.0 | 0.0 | 0.0 | 0.0 | 0.0 | 0.0 | 0.1 | 0.0 |
| 48 | A | 2 | 2 | 0.5 | 0.0 | 0.0 | 0.0 | 0.0 | 0.0 | 0.0 | 0.0 | 0.0 | 0.0 | 0.0 | 0.2 | 0.0 | 0.0 | 0.0 | 0.0 | 0.0 | 0.0 | 0.0 | 0.0 | 0.0 | 0.1 |
| 48 | L | 0 | 1 | 0.1 | 0.0 | 0.0 | 0.0 | 0.0 | 0.0 | 0.0 | 0.0 | 0.0 | 0.0 | 0.0 | 0.0 | 0.0 | 0.0 | 0.0 | 0.0 | 0.0 | 0.0 | 0.0 | 0.0 | 0.0 | 0.0 |
| 48 | M | 2 | 2 | 0.5 | 0.0 | 0.0 | 0.0 | 0.0 | 0.0 | 0.0 | 0.0 | 0.0 | 0.0 | 0.0 | 0.2 | 0.0 | 0.0 | 0.0 | 0.0 | 0.0 | 0.0 | 0.0 | 0.0 | 0.0 | 0.0 |
| 48 | Q | 0 | 1 | 0.1 | 0.0 | 0.0 | 0.0 | 0.0 | 0.0 | 0.0 | 0.0 | 0.0 | 0.0 | 0.0 | 0.1 | 0.0 | 0.0 | 0.0 | 0.0 | 0.0 | 0.0 | 0.0 | 0.0 | 0.0 | 0.0 |
| 48 | S | 1 | 1 | 0.1 | 0.0 | 0.0 | 0.0 | 0.0 | 0.0 | 0.0 | 0.0 | 0.0 | 0.0 | 0.0 | 0.1 | 0.0 | 0.0 | 0.0 | 0.0 | 0.0 | 0.0 | 0.0 | 0.0 | 0.0 | 0.0 |
| 48 | T | 1 | 1 | 0.0 | 0.0 | 0.0 | 0.0 | 0.0 | 0.0 | 0.0 | 0.0 | 0.0 | 0.0 | 0.0 | 0.0 | 0.0 | 0.0 | 0.0 | 0.0 | 0.0 | 0.0 | 0.0 | 0.0 | 0.0 | 0.0 |
| 48 | V | 4 | 4 | 3.7 | 0.0 | 0.0 | 0.0 | 0.0 | 0.0 | 0.0 | 0.0 | 0.0 | 0.0 | 0.0 | 0.7 | 0.0 | 0.0 | 0.0 | 0.0 | 0.0 | 0.0 | 0.0 | 0.0 | 0.0 | 0.0 |
| 50 | L | 4 | 4 | 1.5 | 0.0 | 0.0 | 0.0 | 0.0 | 0.0 | 0.0 | 0.0 | 0.0 | 0.0 | 0.0 | 2.5 | 0.0 | 0.0 | 0.0 | 0.0 | 0.0 | 0.0 | 0.0 | 0.0 | 0.0 | 0.0 |
| 50 | V | 4 | 4 | 1.8 | 0.0 | 0.0 | 0.0 | 0.0 | 0.0 | 0.0 | 0.0 | 0.0 | 0.0 | 0.0 | 1.2 | 0.0 | 0.0 | 0.0 | 0.0 | 0.0 | 0.0 | 0.0 | 0.0 | 0.0 | 0.0 |
| 53 | L | 4 | 4 | 5.9 | 0.0 | 0.0 | 0.0 | 0.0 | 0.0 | 0.0 | 0.1 | 0.1 | 0.0 | 0.0 | 3.0 | 0.0 | 0.0 | 0.0 | 0.0 | 0.0 | 0.0 | 0.1 | 0.0 | 0.0 | 0.0 |
| 53 | W | 1 | 1 | 0.1 | 0.0 | 0.0 | 0.0 | 0.0 | 0.0 | 0.0 | 0.0 | 0.0 | 0.0 | 0.0 | 0.0 | 0.0 | 0.0 | 0.0 | 0.0 | 0.0 | 0.0 | 0.0 | 0.0 | 0.0 | 0.0 |
| 53 | Y | 3 | 2 | 0.4 | 0.0 | 0.0 | 0.0 | 0.0 | 0.0 | 0.1 | 0.0 | 0.0 | 0.0 | 0.0 | 0.2 | 0.0 | 0.0 | 0.0 | 0.0 | 0.0 | 0.2 | 0.1 | 0.0 | 0.0 | 0.0 |
| 54 | A | 4 | 4 | 1.3 | 0.0 | 0.0 | 0.0 | 0.0 | 0.0 | 0.0 | 0.0 | 0.0 | 0.0 | 0.0 | 0.4 | 0.0 | 0.0 | 0.0 | 0.0 | 0.0 | 0.0 | 0.0 | 0.0 | 0.0 | 0.0 |
| 54 | L | 4 | 4 | 3.0 | 0.0 | 0.0 | 0.0 | 0.0 | 0.0 | 0.0 | 0.0 | 0.0 | 0.0 | 0.0 | 1.4 | 0.0 | 0.1 | 0.0 | 0.0 | 0.0 | 0.0 | 0.0 | 0.0 | 0.0 | 0.0 |
| 54 | M | 4 | 4 | 2.3 | 0.0 | 0.0 | 0.0 | 0.0 | 0.0 | 0.0 | 0.0 | 0.1 | 0.0 | 0.0 | 0.6 | 0.0 | 0.0 | 0.0 | 0.0 | 0.0 | 0.0 | 0.0 | 0.0 | 0.0 | 0.1 |
| 54 | S | 4 | 3 | 0.7 | 0.0 | 0.0 | 0.0 | 0.0 | 0.0 | 0.0 | 0.0 | 0.0 | 0.0 | 0.0 | 0.1 | 0.0 | 0.0 | 0.0 | 0.0 | 0.0 | 0.0 | 0.0 | 0.0 | 0.0 | 0.0 |
| 54 | T | 4 | 4 | 0.8 | 0.0 | 0.1 | 0.0 | 0.0 | 0.0 | 0.0 | 0.0 | 0.0 | 0.0 | 0.2 | 0.2 | 0.0 | 0.0 | 0.0 | 0.0 | 0.0 | 0.0 | 0.0 | 0.1 | 0.0 | 0.0 |
| 54 | V | 4 | 4 | 23  | 0.0 | 0.0 | 0.0 | 0.0 | 0.0 | 0.0 | 0.0 | 0.0 | 0.0 | 0.0 | 12  | 0.0 | 0.0 | 0.0 | 0.0 | 0.0 | 0.0 | 0.0 | 0.0 | 0.0 | 0.0 |
| 58 | E | 4 | 3 | 6.3 | 0.3 | 0.1 | 0.4 | 0.4 | 0.0 | 0.0 | 1.2 | 0.1 | 0.1 | 0.2 | 4.3 | 0.4 | 0.1 | 0.6 | 0.5 | 0.0 | 0.0 | 0.7 | 0.5 | 0.3 | 0.4 |
| 60 | E | 2 | 2 | 12  | 9.0 | 5.2 | 8.9 | 17  | 2.8 | 0.6 | 16  | 11  | 2.1 | 37  | 13  | 15  | 6.2 | 18  | 19  | 2.9 | 1.0 | 15  | 27  | 2.4 | 32  |
| 62 | V | 3 | 3 | 34  | 17  | 6.3 | 27  | 4.6 | 4.7 | 1.4 | 19  | 19  | 3.2 | 20  | 25  | 17  | 7.9 | 33  | 5.1 | 5.5 | 2.2 | 21  | 23  | 6.3 | 16  |
| 63 | P | 3 | 2 | 63  | 40  | 15  | 55  | 36  | 12  | 19  | 35  | 9.1 | 20  | 14  | 49  | 37  | 17  | 54  | 37  | 17  | 22  | 39  | 9.6 | 24  | 33  |
| 64 | L | 1 | 1 | 2.9 | 3.6 | 1.2 | 4.5 | 1.9 | 0.6 | 7.3 | 3.1 | 2.6 | 3.6 | 2.4 | 3.4 | 3.6 | 2.3 | 4.7 | 2.2 | 0.6 | 9.8 | 5.2 | 2.8 | 5.1 | 2.9 |
| 64 | M | 2 | 2 | 1.7 | 2.6 | 2.0 | 1.6 | 1.6 | 0.8 | 13  | 0.8 | 2.1 | 9.6 | 3.6 | 2.2 | 3.3 | 3.4 | 1.9 | 1.9 | 0.6 | 18  | 0.9 | 1.9 | 13  | 2.1 |
| 64 | V | 2 | 3 | 18  | 11  | 0.8 | 16  | 0.5 | 0.4 | 1.7 | 66  | 0.6 | 0.4 | 13  | 13  | 7.1 | 1.2 | 14  | 0.8 | 0.6 | 1.8 | 57  | 1.5 | 0.7 | 5.5 |
| 66 | V | 0 | 1 | 1.1 | 0.1 | 0.1 | 0.1 | 0.1 | 0.0 | 0.4 | 0.1 | 0.0 | 0.1 | 1.4 | 0.4 | 0.1 | 0.1 | 0.0 | 0.1 | 0.0 | 0.2 | 0.0 | 0.1 | 0.4 | 0.4 |

|    |   |   |   |     |     |     |     |     |     |     |     |     |     |     |     |     |     |     |     |     |     |     |      |     |     |
|----|---|---|---|-----|-----|-----|-----|-----|-----|-----|-----|-----|-----|-----|-----|-----|-----|-----|-----|-----|-----|-----|------|-----|-----|
| 69 | I | 1 | 1 | 0.1 | 0.0 | 0.0 | 0.0 | 0.0 | 0.1 | 0.1 | 0.1 | 0.0 | 0.0 | 0.0 | 0.1 | 0.0 | 0.1 | 0.0 | 0.0 | 0.1 | 0.1 | 0.0 | 0.0  | 0.1 | 0.0 |
| 69 | K | 3 | 2 | 15  | 41  | 96  | 1.5 | 98  | 97  | 96  | 2.8 | 1.4 | 94  | 61  | 41  | 54  | 92  | 2.6 | 97  | 96  | 96  | 6.4 | 3.7  | 89  | 58  |
| 69 | N | 1 | 1 | 1.0 | 0.5 | 0.1 | 0.7 | 0.1 | 0.1 | 0.2 | 0.3 | 0.1 | 0.3 | 0.2 | 0.2 | 0.3 | 0.3 | 0.6 | 0.0 | 0.2 | 0.3 | 0.1 | 0.6  | 0.4 | 0.4 |
| 69 | Q | 1 | 1 | 3.3 | 2.4 | 2.1 | 2.9 | 1.1 | 0.7 | 1.0 | 5.1 | 8.4 | 1.4 | 11  | 4.2 | 2.8 | 4.4 | 4.0 | 1.3 | 0.7 | 1.1 | 16  | 7.3  | 1.1 | 6.7 |
| 69 | R | 1 | 2 | 1.5 | 0.6 | 0.7 | 0.4 | 0.3 | 1.0 | 1.2 | 0.3 | 1.0 | 4.0 | 1.2 | 1.0 | 0.9 | 1.3 | 0.4 | 0.4 | 0.9 | 2.3 | 0.3 | 0.6  | 8.4 | 0.8 |
| 69 | Y | 1 | 1 | 2.2 | 1.9 | 0.0 | 2.5 | 0.0 | 0.0 | 0.0 | 18  | 7.2 | 0.0 | 1.2 | 1.9 | 1.4 | 0.2 | 2.3 | 0.0 | 0.0 | 0.0 | 9.7 | 17.9 | 0.0 | 0.7 |
| 71 | I | 4 | 2 | 3.2 | 0.1 | 0.0 | 0.1 | 0.0 | 0.0 | 0.0 | 0.0 | 0.0 | 0.0 | 0.0 | 1.7 | 0.1 | 0.0 | 0.3 | 0.0 | 0.0 | 0.0 | 0.0 | 0.0  | 0.0 | 0.0 |
| 71 | L | 3 | 2 | 0.4 | 0.0 | 0.0 | 0.0 | 0.0 | 0.0 | 0.0 | 0.0 | 0.0 | 0.0 | 0.0 | 0.2 | 0.0 | 0.0 | 0.0 | 0.0 | 0.0 | 0.0 | 0.0 | 0.0  | 0.0 | 0.0 |
| 71 | T | 4 | 3 | 9.9 | 4.7 | 0.1 | 8.2 | 1.0 | 0.2 | 0.2 | 1.9 | 0.1 | 0.4 | 0.3 | 6.3 | 4.7 | 0.2 | 11  | 1.0 | 0.3 | 0.3 | 3.0 | 0.5  | 0.5 | 2.5 |
| 71 | V | 4 | 2 | 27  | 3.3 | 0.0 | 5.9 | 0.2 | 0.3 | 0.2 | 0.3 | 0.1 | 0.3 | 0.5 | 12  | 3.5 | 0.2 | 8.0 | 0.3 | 0.2 | 0.1 | 0.6 | 0.1  | 1.1 | 6.1 |
| 73 | A | 4 | 2 | 0.6 | 0.0 | 0.0 | 0.0 | 0.0 | 0.0 | 0.0 | 0.0 | 0.0 | 0.0 | 0.0 | 0.2 | 0.0 | 0.0 | 0.0 | 0.0 | 0.0 | 0.0 | 0.0 | 0.0  | 0.0 | 0.0 |
| 73 | C | 3 | 3 | 1.1 | 0.0 | 0.0 | 0.0 | 0.0 | 0.0 | 0.0 | 0.0 | 0.0 | 0.0 | 0.0 | 0.3 | 0.0 | 0.0 | 0.0 | 0.0 | 0.0 | 0.0 | 0.0 | 0.0  | 0.0 | 0.0 |
| 73 | D | 0 | 1 | 0.1 | 0.0 | 0.0 | 0.0 | 0.0 | 0.0 | 0.0 | 0.0 | 0.0 | 0.0 | 0.0 | 0.1 | 0.0 | 0.0 | 0.0 | 0.0 | 0.0 | 0.0 | 0.0 | 0.1  | 0.1 | 0.0 |
| 73 | S | 4 | 4 | 8.3 | 0.0 | 0.0 | 0.0 | 0.0 | 0.0 | 0.1 | 0.0 | 0.0 | 0.0 | 0.3 | 2.7 | 0.0 | 0.0 | 0.0 | 0.0 | 0.0 | 0.1 | 0.0 | 0.0  | 0.0 | 0.2 |
| 73 | T | 4 | 4 | 2.4 | 0.0 | 0.0 | 0.0 | 0.0 | 0.0 | 0.0 | 0.0 | 0.0 | 0.0 | 0.0 | 0.6 | 0.0 | 0.0 | 0.0 | 0.0 | 0.0 | 0.0 | 0.0 | 0.0  | 0.0 | 0.0 |
| 73 | V | 1 | 1 | 0.2 | 0.0 | 0.0 | 0.0 | 0.0 | 0.0 | 0.0 | 0.0 | 0.1 | 0.0 | 0.0 | 0.1 | 0.0 | 0.0 | 0.0 | 0.0 | 0.0 | 0.0 | 0.0 | 0.0  | 0.0 | 0.0 |
| 74 | A | 1 | 1 | 1.8 | 0.6 | 0.3 | 0.5 | 2.2 | 0.2 | 0.1 | 0.0 | 1.1 | 0.3 | 0.3 | 1.4 | 0.8 | 0.4 | 0.6 | 2.5 | 0.3 | 0.2 | 0.1 | 0.5  | 0.1 | 0.2 |
| 74 | P | 3 | 4 | 1.9 | 0.1 | 0.0 | 0.1 | 0.0 | 0.1 | 0.0 | 0.1 | 0.0 | 0.0 | 0.2 | 1.3 | 0.0 | 0.0 | 0.0 | 0.0 | 0.0 | 0.0 | 0.1 | 0.0  | 0.0 | 0.0 |
| 74 | S | 2 | 1 | 7.3 | 2.3 | 1.5 | 0.4 | 11  | 0.9 | 1.3 | 0.3 | 7.9 | 0.8 | 1.4 | 7.1 | 3.0 | 2.5 | 0.3 | 12  | 1.0 | 1.2 | 0.1 | 3.0  | 0.6 | 1.5 |
| 76 | V | 4 | 4 | 3.3 | 0.0 | 0.0 | 0.0 | 0.0 | 0.0 | 0.0 | 0.1 | 0.1 | 0.0 | 0.0 | 3.3 | 0.0 | 0.0 | 0.0 | 0.0 | 0.0 | 0.0 | 0.0 | 0.0  | 0.0 | 0.0 |
| 77 | I | 3 | 2 | 27  | 21  | 12  | 33  | 7.4 | 2.0 | 2.6 | 15  | 10  | 2.7 | 26  | 26  | 19  | 12  | 37  | 7.4 | 4.0 | 3.3 | 13  | 15   | 2.5 | 21  |
| 82 | A | 4 | 4 | 22  | 0.0 | 0.0 | 0.1 | 0.0 | 0.0 | 0.0 | 0.0 | 0.1 | 0.0 | 0.0 | 12  | 0.0 | 0.0 | 0.0 | 0.0 | 0.0 | 0.0 | 0.0 | 0.1  | 0.1 | 0.0 |
| 82 | C | 3 | 2 | 0.6 | 0.0 | 0.0 | 0.0 | 0.0 | 0.0 | 0.0 | 0.0 | 0.0 | 0.0 | 0.0 | 0.4 | 0.0 | 0.0 | 0.0 | 0.0 | 0.0 | 0.0 | 0.0 | 0.0  | 0.0 | 0.0 |
| 82 | F | 4 | 4 | 1.8 | 0.0 | 0.0 | 0.0 | 0.0 | 0.0 | 0.0 | 0.0 | 0.0 | 0.0 | 0.0 | 1.1 | 0.0 | 0.0 | 0.0 | 0.0 | 0.0 | 0.0 | 0.0 | 0.0  | 0.0 | 0.0 |
| 82 | G | 1 | 1 | 0.1 | 0.0 | 0.0 | 0.0 | 0.0 | 0.0 | 0.0 | 0.0 | 0.0 | 0.0 | 0.0 | 0.1 | 0.0 | 0.0 | 0.0 | 0.0 | 0.0 | 0.0 | 0.0 | 0.0  | 0.0 | 0.0 |
| 82 | L | 3 | 3 | 0.3 | 0.0 | 0.0 | 0.0 | 0.0 | 0.0 | 0.0 | 0.0 | 0.0 | 0.0 | 0.0 | 0.2 | 0.0 | 0.0 | 0.1 | 0.0 | 0.0 | 0.0 | 0.0 | 0.0  | 0.0 | 0.0 |
| 82 | M | 3 | 2 | 0.3 | 0.0 | 0.0 | 0.0 | 0.0 | 0.0 | 0.0 | 0.0 | 0.0 | 0.0 | 0.0 | 0.4 | 0.0 | 0.0 | 0.0 | 0.0 | 0.0 | 0.0 | 0.0 | 0.1  | 0.0 | 0.0 |
| 82 | S | 4 | 4 | 1.3 | 0.0 | 0.0 | 0.0 | 0.0 | 0.0 | 0.0 | 0.0 | 0.0 | 0.0 | 0.0 | 0.5 | 0.0 | 0.0 | 0.0 | 0.0 | 0.0 | 0.0 | 0.0 | 0.0  | 0.0 | 0.0 |
| 82 | T | 4 | 4 | 2.8 | 0.0 | 0.0 | 0.0 | 0.0 | 0.0 | 0.0 | 0.0 | 0.0 | 0.0 | 0.0 | 0.8 | 0.0 | 0.0 | 0.0 | 0.0 | 0.0 | 0.0 | 0.0 | 0.0  | 0.0 | 0.0 |
| 83 | D | 2 | 3 | 0.9 | 0.0 | 0.0 | 0.0 | 0.0 | 0.0 | 0.0 | 0.0 | 0.0 | 0.0 | 0.0 | 0.6 | 0.0 | 0.0 | 0.0 | 0.0 | 0.1 | 0.0 | 0.0 | 0.0  | 0.1 | 0.0 |
| 84 | A | 3 | 3 | 0.1 | 0.0 | 0.0 | 0.0 | 0.0 | 0.0 | 0.0 | 0.0 | 0.0 | 0.0 | 0.0 | 0.0 | 0.0 | 0.0 | 0.0 | 0.0 | 0.0 | 0.0 | 0.0 | 0.0  | 0.0 | 0.0 |
| 84 | C | 2 | 2 | 0.1 | 0.0 | 0.0 | 0.0 | 0.0 | 0.0 | 0.0 | 0.0 | 0.0 | 0.0 | 0.0 | 0.0 | 0.0 | 0.0 | 0.0 | 0.0 | 0.0 | 0.0 | 0.0 | 0.0  | 0.0 | 0.0 |
| 84 | V | 4 | 4 | 12  | 0.0 | 0.0 | 0.0 | 0.0 | 0.0 | 0.0 | 0.1 | 0.0 | 0.0 | 0.0 | 3.8 | 0.0 | 0.0 | 0.1 | 0.0 | 0.0 | 0.0 | 0.0 | 0.0  | 0.0 | 0.1 |
| 85 | V | 3 | 3 | 4.6 | 0.2 | 0.1 | 0.2 | 0.1 | 0.1 | 0.1 | 0.5 | 0.0 | 0.0 | 0.2 | 2.1 | 0.2 | 0.4 | 0.2 | 0.1 | 0.1 | 0.1 | 0.2 | 0.0  | 0.0 | 0.2 |
| 88 | D | 4 | 4 | 5.4 | 0.0 | 0.0 | 0.0 | 0.0 | 0.1 | 0.0 | 0.0 | 0.0 | 0.0 | 0.0 | 2.7 | 0.0 | 0.1 | 0.0 | 0.0 | 0.0 | 0.0 | 0.0 | 0.0  | 0.1 | 0.0 |
| 88 | G | 1 | 1 | 0.2 | 0.0 | 0.0 | 0.0 | 0.0 | 0.0 | 0.0 | 0.0 | 0.0 | 0.0 | 0.0 | 0.1 | 0.0 | 0.0 | 0.0 | 0.0 | 0.0 | 0.0 | 0.0 | 0.0  | 0.0 | 0.0 |
| 88 | S | 4 | 4 | 1.6 | 0.0 | 0.0 | 0.0 | 0.0 | 0.0 | 0.1 | 0.0 | 0.0 | 0.1 | 0.0 | 1.0 | 0.0 | 0.0 | 0.0 | 0.0 | 0.0 | 0.0 | 0.0 | 0.0  | 0.0 | 0.0 |

|           |          |   |   |     |     |     |     |     |     |     |     |     |     |     |     |     |     |     |     |     |     |     |     |     |     |
|-----------|----------|---|---|-----|-----|-----|-----|-----|-----|-----|-----|-----|-----|-----|-----|-----|-----|-----|-----|-----|-----|-----|-----|-----|-----|
| 88        | T        | 1 | 1 | 0.1 | 0.0 | 0.0 | 0.0 | 0.0 | 0.0 | 0.0 | 0.0 | 0.0 | 0.0 | 0.0 | 0.1 | 0.0 | 0.0 | 0.0 | 0.0 | 0.0 | 0.0 | 0.0 | 0.0 | 0.0 | 0.0 |
| 89        | I        | 3 | 2 | 2.9 | 1.3 | 1.6 | 0.1 | 2.3 | 2.1 | 5.9 | 0.2 | 1.0 | 2.4 | 11  | 4.0 | 2.0 | 2.6 | 0.2 | 3.2 | 2.1 | 7.9 | 0.1 | 1.4 | 3.6 | 5.8 |
| 89        | M        | 2 | 1 | 14  | 40  | 97  | 1.6 | 82  | 96  | 93  | 2.1 | 80  | 96  | 55  | 38  | 51  | 95  | 1.9 | 76  | 94  | 92  | 4.9 | 83  | 95  | 51  |
| 89        | R        | 1 | 1 | 0.0 | 0.0 | 0.0 | 0.0 | 0.0 | 0.0 | 0.0 | 0.0 | 0.0 | 0.0 | 0.0 | 0.0 | 0.0 | 0.0 | 0.0 | 0.0 | 0.0 | 0.0 | 0.0 | 0.1 | 0.0 | 0.1 |
| 89        | T        | 3 | 2 | 0.4 | 0.0 | 0.0 | 0.0 | 0.0 | 0.0 | 0.0 | 0.0 | 0.0 | 0.0 | 0.0 | 0.9 | 0.0 | 0.0 | 0.0 | 0.0 | 0.0 | 0.0 | 0.0 | 0.0 | 0.0 | 0.0 |
| 89        | V        | 4 | 4 | 3.7 | 0.1 | 0.0 | 0.0 | 0.1 | 0.0 | 0.4 | 0.1 | 0.1 | 0.1 | 0.2 | 1.4 | 0.0 | 0.0 | 0.0 | 0.0 | 0.1 | 0.2 | 0.0 | 0.1 | 0.1 | 0.1 |
| <b>90</b> | <b>M</b> | 4 | 4 | 30  | 0.2 | 0.0 | 0.3 | 0.2 | 0.1 | 0.1 | 0.1 | 0.1 | 0.3 | 0.2 | 9.6 | 0.2 | 0.1 | 0.4 | 0.1 | 0.0 | 0.2 | 0.0 | 0.1 | 0.4 | 0.1 |
| 93        | L        | 2 | 1 | 40  | 41  | 21  | 42  | 96  | 19  | 3.5 | 3.9 | 8.8 | 4.2 | 21  | 45  | 49  | 17  | 53  | 96  | 35  | 0.7 | 11  | 14  | 2.5 | 42  |
| 93        | M        | 3 | 1 | 0.7 | 0.1 | 0.3 | 0.1 | 0.0 | 0.2 | 0.3 | 0.1 | 0.6 | 0.2 | 0.6 | 0.2 | 0.1 | 0.3 | 0.1 | 0.0 | 0.3 | 0.4 | 0.0 | 0.4 | 0.0 | 0.4 |

**Abbreviation:** Pos – amino acid position; AA – amino acid; List – Number of expert lists with the mutation in 2009 and 2020; %PI – percent prevalence among PI-experienced persons; %PI-Naïve – percent prevalence among PI-naïve persons.

The parenthetical numbers in the headers represent the number of persons from whom a sequence was available.

<sup>1</sup>40 PI-associated surveillance drug resistance mutations at 18 positions (Bennett 2009) were indicated in bold.

**Table S2.** List of 66 NRTI-associated mutations included in one or more of four expert 2020 lists: prevalence in RTI-naïve and NRTI-experienced persons before and after 2009.

[illegible]



**Abbreviation:** Pos – amino acid position; AA – amino acid; List – Number of expert lists with the mutation in 2009 and 2020; %NRTI – percent prevalence among NRTI-experienced persons; %RTI-Naïve – percent prevalence among RTI-naïve persons.

The parenthetical numbers in the headers represent the number of persons from whom a sequence was available

<sup>1</sup>34 NRTI-associated surveillance drug resistance mutations at 15 positions (Bennett 2009) were indicated in bold.

**Table S3.** List of 69 NNRTI-associated mutations included in one or more of four expert 2020 lists: prevalence in RTI-naïve and NNRTI-experienced persons before and after 2009.

| Pos <sup>1</sup> | AA <sup>1</sup> | Lists |      | <2009  |            |                 |              |               |              |               |               |              |            |              | ≥2009  |                  |          |                 |              |               |              |               |               |            |            |            |                  |
|------------------|-----------------|-------|------|--------|------------|-----------------|--------------|---------------|--------------|---------------|---------------|--------------|------------|--------------|--------|------------------|----------|-----------------|--------------|---------------|--------------|---------------|---------------|------------|------------|------------|------------------|
|                  |                 |       |      | %NNRTI | %RTI-Naïve |                 |              |               |              |               |               |              |            |              | %NNRTI | %RTI-Naïve       |          |                 |              |               |              |               |               |            |            |            |                  |
|                  |                 | 2009  | 2020 |        | (27,755)   | ALL<br>(54,910) | A<br>(4,245) | B<br>(30,428) | C<br>(7,596) | 01<br>(4,571) | 02<br>(2,871) | D<br>(1,279) | F<br>(606) | G<br>(1,003) |        | Other<br>(2,361) | (22,219) | ALL<br>(45,940) | A<br>(2,423) | B<br>(18,847) | C<br>(4,811) | 01<br>(9,495) | 02<br>(2,382) | D<br>(612) | F<br>(777) | G<br>(495) | Other<br>(6,048) |
|                  |                 |       |      |        |            |                 |              |               |              |               |               |              |            |              |        |                  |          |                 |              |               |              |               |               |            |            |            |                  |
| 90               | I               | 2     | 3    | 5.9    | 1.9        | 1.4             | 2.1          | 1.0           | 0.5          | 6.8           | 2.6           | 0.2          | 1.2        | 0.8          | 8.6    | 1.6              | 1.9      | 1.7             | 1.1          | 0.5           | 7.2          | 1.6           | 0.0           | 3.6        | 0.5        |            |                  |
| 98               | G               | 4     | 4    | 6.4    | 0.2        | 0.1             | 0.1          | 0.8           | 0.2          | 0.1           | 0.1           | 0.5          | 0.3        | 0.0          | 8.3    | 0.2              | 0.1      | 0.2             | 0.6          | 0.1           | 0.3          | 0.2           | 0.9           | 1.0        | 0.2        |            |                  |
| 100              | I               | 4     | 4    | 4.5    | 0.0        | 0.0             | 0.0          | 0.1           | 0.0          | 0.0           | 0.2           | 0.0          | 0.0        | 0.0          | 3.5    | 0.0              | 0.0      | 0.0             | 0.0          | 0.0           | 0.0          | 0.0           | 0.0           | 0.0        | 0.0        |            |                  |
| 100              | V               | 1     | 1    | 0.1    | 0.0        | 0.0             | 0.1          | 0.0           | 0.0          | 0.0           | 0.0           | 0.0          | 0.0        | 0.0          | 0.1    | 0.0              | 0.0      | 0.0             | 0.0          | 0.0           | 0.0          | 0.0           | 0.0           | 0.0        | 0.1        |            |                  |
| 101              | E               | 4     | 4    | 7.2    | 0.1        | 0.1             | 0.2          | 0.1           | 0.0          | 0.1           | 0.4           | 0.0          | 0.1        | 0.0          | 9.3    | 0.2              | 0.2      | 0.2             | 0.3          | 0.1           | 0.1          | 0.2           | 0.0           | 0.8        | 0.1        |            |                  |
| 101              | H               | 1     | 3    | 1.3    | 0.0        | 0.0             | 0.0          | 0.0           | 0.0          | 0.0           | 0.0           | 0.0          | 0.0        | 0.0          | 1.3    | 0.0              | 0.0      | 0.0             | 0.0          | 0.0           | 0.0          | 0.0           | 0.0           | 0.0        | 0.0        |            |                  |
| 101              | I               | 0     | 1    | 0.1    | 0.0        | 0.0             | 0.0          | 0.0           | 0.0          | 0.0           | 0.0           | 0.2          | 0.0        | 0.0          | 0.1    | 0.0              | 0.0      | 0.0             | 0.0          | 0.0           | 0.0          | 0.0           | 0.0           | 0.0        | 0.0        |            |                  |
| 101              | N               | 2     | 1    | 0.5    | 0.0        | 0.0             | 0.0          | 0.0           | 0.0          | 0.1           | 0.0           | 0.0          | 0.0        | 0.0          | 0.7    | 0.0              | 0.1      | 0.0             | 0.0          | 0.0           | 0.0          | 0.0           | 0.2           | 0.0        | 0.0        |            |                  |
| 101              | P               | 4     | 4    | 1.7    | 0.0        | 0.0             | 0.0          | 0.0           | 0.0          | 0.0           | 0.0           | 0.0          | 0.0        | 0.0          | 1.4    | 0.0              | 0.0      | 0.0             | 0.0          | 0.0           | 0.0          | 0.0           | 0.0           | 0.0        | 0.0        |            |                  |
| 101              | Q               | 2     | 1    | 4.9    | 0.5        | 0.4             | 0.6          | 0.5           | 0.3          | 0.6           | 0.2           | 0.2          | 0.7        | 0.1          | 3.9    | 0.7              | 0.9      | 0.9             | 0.6          | 0.4           | 0.8          | 0.5           | 0.5           | 0.2        | 0.9        |            |                  |
| 101              | R               | 2     | 2    | 1.6    | 1.0        | 0.3             | 1.2          | 0.9           | 0.7          | 0.3           | 1.1           | 0.8          | 0.6        | 2.0          | 1.6    | 1.1              | 0.7      | 1.2             | 1.1          | 0.9           | 0.6          | 0.5           | 0.6           | 0.0        | 1.0        |            |                  |
| 101              | T               | 0     | 1    | 0.4    | 0.0        | 0.0             | 0.0          | 0.0           | 0.0          | 0.0           | 0.0           | 0.0          | 0.0        | 0.0          | 0.2    | 0.0              | 0.0      | 0.0             | 0.0          | 0.0           | 0.0          | 0.0           | 0.0           | 0.0        | 0.0        |            |                  |
| 103              | H               | 2     | 3    | 0.1    | 0.0        | 0.0             | 0.0          | 0.0           | 0.0          | 0.0           | 0.0           | 0.0          | 0.0        | 0.0          | 0.0    | 0.0              | 0.0      | 0.0             | 0.0          | 0.0           | 0.0          | 0.0           | 0.0           | 0.0        | 0.0        |            |                  |
| 103              | N               | 4     | 4    | 36     | 1.3        | 0.5             | 1.8          | 1.1           | 0.2          | 0.7           | 0.9           | 1.5          | 0.9        | 0.7          | 36     | 1.6              | 2.1      | 2.3             | 1.5          | 0.4           | 2.4          | 2.3           | 1.5           | 3.0        | 1.3        |            |                  |
| 103              | R               | 2     | 2    | 2.4    | 1.9        | 0.2             | 2.9          | 1.2           | 0.8          | 0.2           | 0.4           | 0.3          | 0.2        | 0.4          | 2.8    | 2.0              | 0.3      | 3.1             | 1.2          | 2.1           | 0.7          | 0.3           | 1.0           | 0.6        | 1.6        |            |                  |
| 103              | S               | 3     | 4    | 2.0    | 0.0        | 0.0             | 0.0          | 0.1           | 0.0          | 0.0           | 0.0           | 0.2          | 0.0        | 0.0          | 2.3    | 0.1              | 0.2      | 0.1             | 0.0          | 0.0           | 0.0          | 0.2           | 0.0           | 0.0        | 0.1        |            |                  |
| 103              | T               | 3     | 3    | 0.2    | 0.0        | 0.0             | 0.0          | 0.0           | 0.0          | 0.0           | 0.0           | 0.0          | 0.0        | 0.0          | 0.1    | 0.0              | 0.0      | 0.0             | 0.0          | 0.0           | 0.0          | 0.0           | 0.0           | 0.0        | 0.0        |            |                  |
| 106              | A               | 4     | 4    | 1.8    | 0.0        | 0.0             | 0.0          | 0.0           | 0.0          | 0.0           | 0.0           | 0.0          | 0.1        | 0.0          | 1.4    | 0.0              | 0.0      | 0.0             | 0.0          | 0.0           | 0.0          | 0.0           | 0.0           | 0.0        | 0.1        |            |                  |
| 106              | I               | 4     | 4    | 3.9    | 1.9        | 1.3             | 2.2          | 0.0           | 4.8          | 0.5           | 1.6           | 4.6          | 1.1        | 2.0          | 3.5    | 3.0              | 1.7      | 4.5             | 0.2          | 2.9           | 1.4          | 2.1           | 16            | 2.2        | 1.1        |            |                  |
| 106              | M               | 4     | 4    | 2.6    | 0.0        | 0.0             | 0.0          | 0.0           | 0.0          | 0.0           | 0.0           | 0.0          | 0.0        | 0.0          | 9.1    | 0.1              | 0.0      | 0.0             | 0.2          | 0.1           | 0.0          | 0.0           | 0.0           | 0.2        | 0.0        |            |                  |
| 106              | T               | 0     | 1    | 0.0    | 0.0        | 0.0             | 0.0          | 0.0           | 0.0          | 0.0           | 0.0           | 0.0          | 0.0        | 0.0          | 0.0    | 0.0              | 0.0      | 0.0             | 0.0          | 0.0           | 0.0          | 0.0           | 0.0           | 0.0        | 0.0        |            |                  |
| 108              | I               | 3     | 3    | 8.6    | 0.5        | 0.7             | 0.5          | 0.2           | 0.2          | 0.7           | 0.3           | 0.3          | 0.1        | 0.4          | 9.4    | 0.4              | 0.3      | 0.5             | 0.2          | 0.2           | 0.9          | 0.3           | 0.3           | 0.2        | 0.1        |            |                  |
| 138              | A               | 0     | 4    | 3.1    | 2.5        | 3.2             | 1.9          | 6.0           | 0.4          | 2.7           | 3.0           | 3.3          | 2.2        | 1.6          | 4.9    | 2.2              | 6.2      | 1.9             | 5.4          | 0.3           | 2.7          | 2.1           | 1.7           | 1.8        | 0.6        |            |                  |
| 138              | G               | 0     | 4    | 0.7    | 0.2        | 0.2             | 0.2          | 0.3           | 0.4          | 0.1           | 0.5           | 2.0          | 0.1        | 0.1          | 1.1    | 0.4              | 0.2      | 0.3             | 0.3          | 0.2           | 0.3          | 0.3           | 0.5           | 0.2        | 1.6        |            |                  |
| 138              | K               | 2     | 4    | 0.4    | 0.1        | 0.0             | 0.1          | 0.2           | 0.0          | 0.1           | 0.3           | 0.0          | 0.0        | 0.0          | 0.7    | 0.1              | 0.0      | 0.1             | 0.1          | 0.1           | 0.1          | 0.3           | 0.1           | 0.2        | 0.2        |            |                  |
| 138              | Q               | 0     | 4    | 1.0    | 0.0        | 0.1             | 0.0          | 0.0           | 0.0          | 0.0           | 0.1           | 0.2          | 0.0        | 0.0          | 1.6    | 0.1              | 0.1      | 0.1             | 0.0          | 0.0           | 0.0          | 0.0           | 0.0           | 0.2        | 0.0        |            |                  |
| 138              | R               | 0     | 4    | 0.0    | 0.0        | 0.0             | 0.0          | 0.0           | 0.0          | 0.1           | 0.0           | 0.0          | 0.0        | 0.0          | 0.1    | 0.0              | 0.0      | 0.0             | 0.0          | 0.0           | 0.0          | 0.0           | 0.0           | 0.0        | 0.0        |            |                  |
| 138              | S               | 0     | 2    | 0.0    | 0.0        | 0.0             | 0.0          | 0.3           | 0.0          | 0.0           | 0.0           | 0.0          | 0.0        | 0.0          | 0.1    | 0.0              | 0.1      | 0.0             | 0.1          | 0.0           | 0.0          | 0.0           | 0.0           | 0.0        | 0.0        |            |                  |
| 179              | D               | 4     | 4    | 2.2    | 1.6        | 0.2             | 2.1          | 1.1           | 2.2          | 0.0           | 0.2           | 3.8          | 0.0        | 0.7          | 3.3    | 2.4              | 0.5      | 3.1             | 1.8          | 3.3           | 0.0          | 0.5           | 0.8           | 0.0        | 1.9        |            |                  |
| 179              | E               | 2     | 2    | 1.2    | 0.6        | 0.0             | 0.6          | 0.1           | 0.2          | 0.8           | 0.4           | 0.0          | 4.3        | 0.5          | 1.8    | 1.5              | 0.0      | 1.4             | 0.3          | 0.7           | 1.0          | 0.2           | 0.3           | 3.4        | 15         |            |                  |

|     |   |   |   |     |     |     |     |     |      |     |     |     |     |     |     |     |     |     |     |     |     |     |     |     |     |
|-----|---|---|---|-----|-----|-----|-----|-----|------|-----|-----|-----|-----|-----|-----|-----|-----|-----|-----|-----|-----|-----|-----|-----|-----|
| 179 | F | 4 | 3 | 0.3 | 0.0 | 0.0 | 0.0 | 0.0 | 0.0  | 0.0 | 0.0 | 0.0 | 0.0 | 0.1 | 0.2 | 0.0 | 0.0 | 0.0 | 0.0 | 0.0 | 0.0 | 0.0 | 0.0 | 0.0 | 0.0 |
| 179 | I | 2 | 1 | 13  | 8.9 | 54  | 4.3 | 3.1 | 16.2 | 3.9 | 7.0 | 5.3 | 0.4 | 6.6 | 16  | 10  | 51  | 5.4 | 3.7 | 20  | 5.3 | 6.9 | 17  | 0.8 | 6.1 |
| 179 | L | 0 | 4 | 0.2 | 0.0 | 0.0 | 0.0 | 0.0 | 0.0  | 0.0 | 0.0 | 0.0 | 0.0 | 0.0 | 0.3 | 0.0 | 0.0 | 0.0 | 0.0 | 0.0 | 0.1 | 0.0 | 0.0 | 0.0 | 0.0 |
| 179 | M | 1 | 1 | 0.1 | 0.0 | 0.0 | 0.0 | 0.0 | 0.0  | 0.2 | 0.0 | 0.0 | 0.0 | 0.0 | 0.3 | 0.0 | 0.0 | 0.0 | 0.0 | 0.0 | 0.1 | 0.0 | 0.1 | 0.0 | 0.0 |
| 179 | T | 1 | 3 | 0.5 | 0.3 | 1.6 | 0.1 | 0.0 | 1.1  | 0.1 | 1.0 | 0.2 | 0.0 | 0.4 | 0.9 | 0.8 | 1.7 | 0.2 | 0.1 | 2.9 | 0.2 | 1.5 | 0.1 | 0.0 | 0.9 |
| 181 | C | 4 | 4 | 18  | 0.2 | 0.1 | 0.1 | 0.3 | 0.2  | 0.1 | 0.2 | 0.0 | 0.2 | 0.0 | 18  | 0.2 | 0.2 | 0.1 | 0.2 | 0.1 | 0.3 | 0.7 | 0.1 | 0.4 | 0.3 |
| 181 | F | 0 | 1 | 0.2 | 0.0 | 0.0 | 0.0 | 0.0 | 0.0  | 0.0 | 0.0 | 0.0 | 0.0 | 0.0 | 0.2 | 0.0 | 0.1 | 0.0 | 0.1 | 0.0 | 0.0 | 0.0 | 0.0 | 0.0 | 0.0 |
| 181 | G | 0 | 1 | 0.1 | 0.0 | 0.0 | 0.0 | 0.0 | 0.0  | 0.0 | 0.0 | 0.0 | 0.0 | 0.0 | 0.1 | 0.0 | 0.0 | 0.0 | 0.0 | 0.0 | 0.0 | 0.0 | 0.0 | 0.0 | 0.0 |
| 181 | I | 4 | 4 | 0.8 | 0.0 | 0.0 | 0.0 | 0.0 | 0.0  | 0.0 | 0.0 | 0.0 | 0.0 | 0.0 | 0.6 | 0.0 | 0.1 | 0.0 | 0.0 | 0.0 | 0.0 | 0.0 | 0.0 | 0.0 | 0.0 |
| 181 | S | 1 | 1 | 0.1 | 0.0 | 0.0 | 0.0 | 0.0 | 0.0  | 0.0 | 0.0 | 0.0 | 0.0 | 0.0 | 0.1 | 0.0 | 0.0 | 0.0 | 0.0 | 0.0 | 0.0 | 0.0 | 0.1 | 0.0 | 0.0 |
| 181 | V | 4 | 4 | 0.5 | 0.0 | 0.0 | 0.0 | 0.0 | 0.0  | 0.0 | 0.0 | 0.0 | 0.0 | 0.0 | 0.7 | 0.0 | 0.0 | 0.0 | 0.0 | 0.0 | 0.0 | 0.0 | 0.0 | 0.0 | 0.0 |
| 188 | C | 4 | 4 | 0.7 | 0.0 | 0.0 | 0.0 | 0.0 | 0.0  | 0.0 | 0.0 | 0.0 | 0.0 | 0.0 | 1.0 | 0.0 | 0.1 | 0.0 | 0.0 | 0.0 | 0.0 | 0.0 | 0.0 | 0.0 | 0.0 |
| 188 | F | 1 | 2 | 0.6 | 0.0 | 0.0 | 0.0 | 0.0 | 0.0  | 0.0 | 0.0 | 0.0 | 0.0 | 0.0 | 0.6 | 0.0 | 0.0 | 0.0 | 0.0 | 0.0 | 0.0 | 0.0 | 0.0 | 0.0 | 0.1 |
| 188 | H | 4 | 4 | 0.8 | 0.0 | 0.0 | 0.0 | 0.0 | 0.0  | 0.0 | 0.1 | 0.0 | 0.0 | 0.1 | 0.7 | 0.0 | 0.0 | 0.0 | 0.0 | 0.0 | 0.0 | 0.0 | 0.0 | 0.0 | 0.0 |
| 188 | L | 4 | 4 | 4.5 | 0.0 | 0.0 | 0.1 | 0.0 | 0.0  | 0.0 | 0.0 | 0.0 | 0.3 | 0.0 | 4.4 | 0.1 | 0.0 | 0.1 | 0.0 | 0.0 | 0.0 | 0.5 | 0.0 | 0.0 | 0.1 |
| 189 | I | 0 | 1 | 2.6 | 1.2 | 0.9 | 1.2 | 0.6 | 0.7  | 3.3 | 1.8 | 0.8 | 2.7 | 0.7 | 2.3 | 1.3 | 1.2 | 1.3 | 0.9 | 1.3 | 2.5 | 1.6 | 1.0 | 1.8 | 1.0 |
| 190 | A | 4 | 4 | 15  | 0.2 | 0.0 | 0.2 | 0.1 | 0.1  | 0.1 | 0.2 | 0.0 | 0.0 | 0.0 | 15  | 0.2 | 0.3 | 0.2 | 0.3 | 0.1 | 0.1 | 4.7 | 0.1 | 0.0 | 0.1 |
| 190 | C | 3 | 3 | 0.1 | 0.0 | 0.0 | 0.0 | 0.0 | 0.0  | 0.0 | 0.0 | 0.0 | 0.0 | 0.0 | 0.1 | 0.0 | 0.0 | 0.0 | 0.0 | 0.0 | 0.0 | 0.0 | 0.0 | 0.0 | 0.0 |
| 190 | E | 3 | 4 | 0.5 | 0.0 | 0.0 | 0.0 | 0.0 | 0.1  | 0.0 | 0.0 | 0.0 | 0.0 | 0.0 | 0.6 | 0.1 | 0.0 | 0.0 | 0.1 | 0.1 | 0.0 | 0.0 | 0.0 | 0.0 | 0.1 |
| 190 | Q | 3 | 3 | 0.3 | 0.0 | 0.0 | 0.0 | 0.0 | 0.0  | 0.0 | 0.0 | 0.0 | 0.0 | 0.0 | 0.4 | 0.0 | 0.0 | 0.0 | 0.0 | 0.0 | 0.0 | 0.0 | 0.0 | 0.0 | 0.0 |
| 190 | S | 4 | 4 | 2.7 | 0.0 | 0.0 | 0.0 | 0.0 | 0.0  | 0.0 | 0.0 | 0.0 | 0.0 | 0.0 | 3.3 | 0.0 | 0.0 | 0.0 | 0.0 | 0.0 | 0.0 | 0.2 | 0.0 | 0.0 | 0.0 |
| 190 | T | 3 | 3 | 0.1 | 0.0 | 0.0 | 0.0 | 0.0 | 0.0  | 0.0 | 0.0 | 0.0 | 0.0 | 0.0 | 0.1 | 0.0 | 0.0 | 0.0 | 0.0 | 0.0 | 0.0 | 0.0 | 0.0 | 0.0 | 0.0 |
| 190 | V | 3 | 3 | 0.0 | 0.0 | 0.0 | 0.0 | 0.0 | 0.0  | 0.0 | 0.1 | 0.0 | 0.0 | 0.0 | 0.0 | 0.0 | 0.0 | 0.0 | 0.0 | 0.0 | 0.0 | 0.0 | 0.0 | 0.0 | 0.0 |
| 221 | Y | 1 | 4 | 6.5 | 0.1 | 0.1 | 0.1 | 0.1 | 0.0  | 0.1 | 0.2 | 0.2 | 0.0 | 0.1 | 8.1 | 0.1 | 0.1 | 0.1 | 0.1 | 0.1 | 0.0 | 0.2 | 0.0 | 0.4 | 0.1 |
| 225 | H | 4 | 4 | 4.3 | 0.0 | 0.0 | 0.0 | 0.0 | 0.0  | 0.1 | 0.0 | 0.0 | 0.0 | 0.0 | 7.4 | 0.0 | 0.0 | 0.0 | 0.0 | 0.0 | 0.0 | 0.0 | 0.0 | 0.0 | 0.0 |
| 227 | C | 2 | 4 | 0.0 | 0.0 | 0.0 | 0.0 | 0.0 | 0.0  | 0.0 | 0.0 | 0.0 | 0.0 | 0.0 | 0.1 | 0.0 | 0.0 | 0.0 | 0.0 | 0.0 | 0.0 | 0.0 | 0.0 | 0.0 | 0.0 |
| 227 | I | 0 | 2 | 0.0 | 0.0 | 0.0 | 0.1 | 0.0 | 0.0  | 0.1 | 0.0 | 0.0 | 0.0 | 0.0 | 0.0 | 0.0 | 0.0 | 0.0 | 0.0 | 0.0 | 0.0 | 0.0 | 0.0 | 0.0 | 0.0 |
| 227 | L | 2 | 3 | 2.2 | 0.1 | 0.0 | 0.1 | 0.0 | 0.1  | 0.0 | 0.0 | 0.2 | 0.0 | 0.0 | 3.5 | 0.0 | 0.0 | 0.0 | 0.0 | 0.0 | 0.0 | 0.0 | 0.0 | 0.0 | 0.0 |
| 227 | R | 0 | 1 | 0.0 | 0.0 | 0.0 | 0.0 | 0.0 | 0.0  | 0.0 | 0.0 | 0.0 | 0.0 | 0.0 | 0.0 | 0.0 | 0.0 | 0.0 | 0.0 | 0.0 | 0.0 | 0.0 | 0.0 | 0.0 | 0.0 |
| 227 | V | 0 | 1 | 0.0 | 0.0 | 0.0 | 0.0 | 0.0 | 0.0  | 0.0 | 0.0 | 0.2 | 0.0 | 0.0 | 0.0 | 0.0 | 0.0 | 0.0 | 0.0 | 0.0 | 0.0 | 0.0 | 0.0 | 0.0 | 0.0 |
| 230 | I | 0 | 4 | 0.0 | 0.0 | 0.0 | 0.0 | 0.0 | 0.0  | 0.0 | 0.0 | 0.0 | 0.1 | 0.0 | 0.1 | 0.0 | 0.0 | 0.0 | 0.0 | 0.0 | 0.0 | 0.0 | 0.0 | 0.0 | 0.0 |
| 230 | L | 3 | 4 | 1.5 | 0.0 | 0.0 | 0.0 | 0.0 | 0.0  | 0.0 | 0.0 | 0.0 | 0.0 | 0.0 | 2.6 | 0.0 | 0.0 | 0.0 | 0.0 | 0.0 | 0.0 | 0.0 | 0.0 | 0.0 | 0.1 |
| 230 | V | 0 | 1 | 0.1 | 0.0 | 0.0 | 0.0 | 0.0 | 0.1  | 0.1 | 0.0 | 0.0 | 0.0 | 0.0 | 0.0 | 0.0 | 0.0 | 0.0 | 0.0 | 0.0 | 0.0 | 0.0 | 0.0 | 0.0 | 0.0 |
| 234 | I | 1 | 3 | 0.3 | 0.0 | 0.1 | 0.0 | 0.0 | 0.0  | 0.1 | 0.1 | 0.0 | 0.0 | 0.0 | 0.4 | 0.0 | 0.0 | 0.0 | 0.0 | 0.0 | 0.0 | 0.0 | 0.0 | 0.0 | 0.1 |
| 236 | L | 2 | 2 | 0.1 | 0.0 | 0.0 | 0.0 | 0.0 | 0.0  | 0.2 | 0.0 | 0.2 | 0.0 | 0.2 | 0.2 | 0.0 | 0.0 | 0.1 | 0.0 | 0.0 | 0.0 | 0.0 | 0.0 | 0.0 | 0.0 |
| 238 | N | 1 | 2 | 0.6 | 0.0 | 0.0 | 0.1 | 0.0 | 0.0  | 0.1 | 0.1 | 0.2 | 0.1 | 0.0 | 0.4 | 0.1 | 0.0 | 0.1 | 0.0 | 0.0 | 0.2 | 0.0 | 0.0 | 0.0 | 0.0 |
| 238 | T | 2 | 2 | 2.7 | 0.1 | 0.1 | 0.1 | 0.0 | 0.0  | 0.0 | 0.0 | 0.2 | 0.0 | 0.0 | 3.0 | 0.0 | 0.0 | 0.1 | 0.0 | 0.0 | 0.1 | 0.2 | 0.0 | 0.0 | 0.0 |

|     |   |   |   |     |     |     |     |     |     |     |     |     |     |     |     |     |     |     |     |     |     |     |     |     |     |
|-----|---|---|---|-----|-----|-----|-----|-----|-----|-----|-----|-----|-----|-----|-----|-----|-----|-----|-----|-----|-----|-----|-----|-----|-----|
| 318 | F | 2 | 2 | 1.2 | 0.1 | 0.1 | 0.1 | 0.1 | 0.0 | 0.2 | 0.0 | 0.8 | 0.0 | 0.0 | 1.3 | 0.2 | 0.0 | 0.1 | 0.2 | 0.1 | 0.8 | 0.0 | 0.0 | 1.9 | 0.0 |
| 348 | I | 0 | 1 | 14  | 0.2 | 0.3 | 0.2 | 0.4 | 0.0 | 0.2 | 0.0 | 0.0 | 0.0 | 0.0 | 7.0 | 0.0 | 0.0 | 0.0 | 0.0 | 0.1 | 0.0 | 0.0 | 0.0 | 0.0 | 0.0 |

**Abbreviation:** Pos – amino acid position; AA – amino acid; List – Number of expert lists with the mutation in 2009 and 2020; %NNRTI – percent prevalence among NNRTI-experienced persons; %RTI-Naïve – percent prevalence among RTI-naïve persons.  
The parenthetical numbers in the headers represent the number of persons from whom a sequence was available  
<sup>1</sup>19 NNRTI-associated surveillance drug resistance mutations at 10 positions (Bennett 2009) were indicated in bold.

**Table S4.** Number of sequences according to treatment and subtype

| Subtype    | #Protease sequences     |                              | #RT sequences            |                               |
|------------|-------------------------|------------------------------|--------------------------|-------------------------------|
|            | PI-Naïve<br>(n=115,880) | PI-Experienced<br>(n=32,800) | RTI-Naïve<br>(n=100,850) | RTI-Experienced<br>(n=56,573) |
| All        | 115,880                 | 328,00                       | 100,850                  | 56,573                        |
| A          | 7,525                   | 1,532                        | 6,668                    | 3,873                         |
| B          | 54,567                  | 22,236                       | 49,275                   | 29,132                        |
| C          | 19,129                  | 3,617                        | 12,407                   | 12,109                        |
| CRF01_AE   | 15,454                  | 696                          | 14,066                   | 3,061                         |
| CRF02_AG   | 7,359                   | 366                          | 5,253                    | 2,289                         |
| D          | 2,388                   | 390                          | 1,891                    | 983                           |
| F          | 1,520                   | 1,529                        | 1,383                    | 1,611                         |
| G          | 3461                    | 401                          | 1,498                    | 1,548                         |
| CRF06_cpx  | 393                     | 7                            | 1,134                    | 356                           |
| CRF07_BC   | 651                     | 9                            | 3,311                    | 16                            |
| CRF08_BC   | 225                     | 29                           | 814                      | 29                            |
| CRF12_BF   | 411                     | 1,164                        | 267                      | 673                           |
| CRF18_cpx  | 224                     | 40                           | 104                      | 55                            |
| CRF35_AD   | 430                     | 30                           | 241                      | 16                            |
| CRF45_cpx  | 320                     | 49                           | 64                       | 48                            |
| CRF63_02A1 | 128                     | 77                           | 127                      | 86                            |
| Other      | 1,695                   | 628                          | 2,347                    | 688                           |



**Table S6.** NRTI-associated SDRMs and candidate SDRMs: Comparisons of prevalence in RTI-naïve and NRTI-experienced persons before and after 2009 using Fisher's exact test.

| Pos | AA  | SDRM | RTI-Naïve                   |                             |      |         |                | NRTI-Experienced            |                             |      |          |                 |
|-----|-----|------|-----------------------------|-----------------------------|------|---------|----------------|-----------------------------|-----------------------------|------|----------|-----------------|
|     |     |      | % in<br><2009<br>(n=54,910) | % in<br>≥2009<br>(n=45,940) | OR   | p       | Adjusted<br>p  | % in<br><2009<br>(n=32,363) | % in<br>≥2009<br>(n=24,210) | OR   | p        | Adjusted<br>p   |
| 41  | L   | SDRM | 0.003                       | 0.002                       | 0.62 | 5.9E-05 | <b>2.0E-03</b> | 0.330                       | 0.148                       | 0.35 | 0.0E+00  | <b>0.0E+00</b>  |
| 65  | R   | SDRM | 0.000                       | 0.000                       | 0.85 | 4.3E-01 | 1.0E+00        | 0.040                       | 0.104                       | 2.80 | 3.0E-198 | <b>8.9E-197</b> |
| 67  | E   | SDRM | 0.000                       | 0.000                       | 0.75 | 3.0E-01 | 1.0E+00        | 0.006                       | 0.002                       | 0.37 | 1.1E-11  | <b>1.2E-10</b>  |
| 67  | G   | SDRM | 0.000                       | 0.000                       | 0.50 | 6.9E-02 | 1.0E+00        | 0.024                       | 0.023                       | 0.93 | 9.3E-02  | 3.7E-01         |
| 67  | N   | SDRM | 0.001                       | 0.000                       | 0.52 | 2.7E-02 | 6.9E-01        | 0.302                       | 0.157                       | 0.43 | 0.0E+00  | <b>0.0E+00</b>  |
| 69  | D   | SDRM | 0.001                       | 0.001                       | 1.17 | 2.8E-01 | 1.0E+00        | 0.069                       | 0.031                       | 0.43 | 8.9E-95  | <b>2.3E-93</b>  |
| 69  | ins | SDRM | 0.000                       | 0.000                       | Inf  | 4.6E-01 | 1.0E+00        | 0.010                       | 0.002                       | 0.21 | 1.5E-33  | <b>2.9E-32</b>  |
| 70  | E   | SDRM | 0.000                       | 0.000                       | 0.64 | 2.4E-01 | 1.0E+00        | 0.006                       | 0.026                       | 4.04 | 3.6E-79  | <b>9.0E-78</b>  |
| 70  | R   | SDRM | 0.001                       | 0.000                       | 0.52 | 8.3E-03 | 2.5E-01        | 0.206                       | 0.124                       | 0.54 | 1.6E-151 | <b>4.6E-150</b> |
| 74  | I   | SDRM | 0.000                       | 0.000                       | 1.02 | 5.5E-01 | 1.0E+00        | 0.046                       | 0.037                       | 0.79 | 2.6E-08  | <b>2.6E-07</b>  |
| 74  | V   | SDRM | 0.000                       | 0.000                       | 0.40 | 2.1E-01 | 1.0E+00        | 0.086                       | 0.039                       | 0.43 | 5.0E-115 | <b>1.4E-113</b> |
| 75  | A   | SDRM | 0.000                       | 0.000                       | 0.60 | 3.5E-01 | 1.0E+00        | 0.008                       | 0.002                       | 0.32 | 4.4E-18  | <b>6.5E-17</b>  |
| 75  | M   | SDRM | 0.000                       | 0.001                       | 1.62 | 8.7E-02 | 1.0E+00        | 0.036                       | 0.035                       | 0.96 | 2.0E-01  | 3.7E-01         |
| 75  | S   | SDRM | 0.000                       | 0.000                       | 0.00 | 5.4E-01 | 1.0E+00        | 0.003                       | 0.001                       | 0.47 | 8.3E-05  | <b>5.0E-04</b>  |
| 75  | T   | SDRM | 0.000                       | 0.000                       | 0.00 | 1.0E+00 | 1.0E+00        | 0.015                       | 0.005                       | 0.32 | 2.4E-33  | <b>4.1E-32</b>  |
| 77  | L   | SDRM | 0.002                       | 0.001                       | 0.42 | 1.3E-05 | <b>4.6E-04</b> | 0.019                       | 0.012                       | 0.62 | 6.8E-12  | <b>8.1E-11</b>  |
| 115 | F   | SDRM | 0.000                       | 0.000                       | 0.20 | 9.7E-02 | 1.0E+00        | 0.020                       | 0.045                       | 2.27 | 3.0E-62  | <b>7.3E-61</b>  |
| 116 | Y   | SDRM | 0.000                       | 0.000                       | 0.00 | 8.8E-02 | 1.0E+00        | 0.022                       | 0.010                       | 0.43 | 1.4E-32  | <b>2.3E-31</b>  |
| 151 | M   | SDRM | 0.000                       | 0.000                       | 0.00 | 1.0E+00 | 1.0E+00        | 0.029                       | 0.012                       | 0.43 | 4.8E-42  | <b>9.6E-41</b>  |
| 184 | I   | SDRM | 0.000                       | 0.001                       | 1.91 | 3.3E-02 | 8.2E-01        | 0.023                       | 0.033                       | 1.45 | 4.5E-13  | <b>5.8E-12</b>  |
| 184 | V   | SDRM | 0.002                       | 0.001                       | 0.70 | 1.0E-02 | 3.0E-01        | 0.545                       | 0.606                       | 1.28 | 9.2E-48  | <b>2.0E-46</b>  |
| 210 | W   | SDRM | 0.001                       | 0.001                       | 1.55 | 3.5E-02 | 8.5E-01        | 0.208                       | 0.077                       | 0.32 | 0.0E+00  | <b>0.0E+00</b>  |
| 215 | C   | SDRM | 0.001                       | 0.001                       | 0.92 | 3.9E-01 | 1.0E+00        | 0.009                       | 0.004                       | 0.42 | 8.3E-15  | <b>1.2E-13</b>  |

|     |     |           |       |       |      |         |         |       |       |      |          |          |
|-----|-----|-----------|-------|-------|------|---------|---------|-------|-------|------|----------|----------|
| 215 | D   | SDRM      | 0.003 | 0.002 | 0.64 | 6.4E-04 | 2.1E-02 | 0.008 | 0.004 | 0.55 | 4.7E-08  | 3.7E-07  |
| 215 | E   | SDRM      | 0.001 | 0.002 | 1.25 | 1.1E-01 | 1.0E+00 | 0.002 | 0.001 | 0.75 | 1.2E-01  | 3.7E-01  |
| 215 | F   | SDRM      | 0.000 | 0.000 | 0.60 | 5.7E-01 | 1.0E+00 | 0.118 | 0.083 | 0.68 | 3.9E-42  | 8.2E-41  |
| 215 | I   | SDRM      | 0.000 | 0.000 | 1.05 | 5.1E-01 | 1.0E+00 | 0.022 | 0.020 | 0.94 | 1.4E-01  | 3.7E-01  |
| 215 | S   | SDRM      | 0.004 | 0.003 | 0.82 | 4.5E-02 | 1.0E+00 | 0.025 | 0.018 | 0.73 | 3.2E-08  | 2.9E-07  |
| 215 | V   | SDRM      | 0.000 | 0.000 | 0.80 | 5.8E-01 | 1.0E+00 | 0.009 | 0.005 | 0.57 | 6.8E-08  | 4.8E-07  |
| 215 | Y   | SDRM      | 0.000 | 0.000 | 0.09 | 2.6E-03 | 7.9E-02 | 0.305 | 0.134 | 0.35 | 0.0E+00  | 0.0E+00  |
| 219 | E   | SDRM      | 0.000 | 0.000 | 0.94 | 5.2E-01 | 1.0E+00 | 0.068 | 0.061 | 0.90 | 7.5E-04  | 3.7E-03  |
| 219 | N   | SDRM      | 0.000 | 0.000 | 0.34 | 1.1E-02 | 3.0E-01 | 0.034 | 0.014 | 0.42 | 4.5E-50  | 1.0E-48  |
| 219 | Q   | SDRM      | 0.001 | 0.001 | 0.72 | 7.8E-02 | 1.0E+00 | 0.126 | 0.069 | 0.51 | 5.9E-113 | 1.6E-111 |
| 219 | R   | SDRM      | 0.001 | 0.000 | 0.57 | 2.6E-02 | 6.9E-01 | 0.027 | 0.013 | 0.47 | 2.3E-33  | 4.1E-32  |
| 44  | A   | Candidate | 0.000 | 0.000 | 3.59 | 2.5E-01 | 1.0E+00 | 0.017 | 0.006 | 0.33 | 1.8E-37  | 3.1E-36  |
| 65  | N   | Candidate | 0.000 | 0.000 | 0.28 | 2.5E-02 | 4.2E-01 | 0.001 | 0.002 | 1.77 | 1.1E-02  | 5.2E-02  |
| 67  | H   | Candidate | 0.000 | 0.000 | 3.59 | 2.5E-01 | 1.0E+00 | 0.002 | 0.001 | 0.55 | 2.8E-03  | 2.5E-02  |
| 67  | S   | Candidate | 0.000 | 0.000 | 0.00 | 3.0E-01 | 1.0E+00 | 0.003 | 0.002 | 0.58 | 8.3E-04  | 9.1E-03  |
| 67  | T   | Candidate | 0.000 | 0.000 | 0.00 | 1.0E+00 | 1.0E+00 | 0.002 | 0.002 | 0.63 | 1.0E-02  | 5.2E-02  |
| 69  | A   | Candidate | 0.002 | 0.003 | 1.24 | 4.8E-02 | 7.1E-01 | 0.011 | 0.009 | 0.79 | 3.6E-03  | 2.9E-02  |
| 69  | del | Candidate | 0.000 | 0.000 | 0.00 | 5.4E-01 | 1.0E+00 | 0.001 | 0.003 | 2.30 | 9.4E-06  | 1.1E-04  |
| 69  | G   | Candidate | 0.000 | 0.000 | 0.00 | 5.4E-01 | 1.0E+00 | 0.003 | 0.001 | 0.56 | 1.7E-03  | 1.7E-02  |
| 70  | G   | Candidate | 0.000 | 0.000 | 0.00 | 1.0E+00 | 1.0E+00 | 0.005 | 0.003 | 0.72 | 8.6E-03  | 5.1E-02  |
| 70  | N   | Candidate | 0.000 | 0.000 | 0.96 | 5.2E-01 | 1.0E+00 | 0.003 | 0.004 | 1.31 | 3.4E-02  | 1.0E-01  |
| 70  | Q   | Candidate | 0.000 | 0.000 | 0.22 | 2.5E-02 | 4.2E-01 | 0.002 | 0.006 | 2.76 | 8.1E-13  | 1.3E-11  |
| 70  | T   | Candidate | 0.000 | 0.000 | 1.05 | 5.1E-01 | 1.0E+00 | 0.003 | 0.007 | 2.25 | 1.6E-11  | 2.2E-10  |
| 215 | A   | Candidate | 0.001 | 0.001 | 0.80 | 1.4E-01 | 1.0E+00 | 0.003 | 0.003 | 0.91 | 3.0E-01  | 4.6E-01  |
| 215 | L   | Candidate | 0.001 | 0.001 | 1.05 | 4.8E-01 | 1.0E+00 | 0.002 | 0.002 | 0.84 | 2.3E-01  | 4.6E-01  |
| 215 | N   | Candidate | 0.000 | 0.000 | 0.96 | 5.6E-01 | 1.0E+00 | 0.013 | 0.007 | 0.55 | 2.3E-12  | 3.4E-11  |
| 219 | H   | Candidate | 0.000 | 0.000 | 0.00 | 1.0E+00 | 1.0E+00 | 0.003 | 0.001 | 0.41 | 8.4E-07  | 1.1E-05  |
| 219 | W   | Candidate | 0.000 | 0.000 | 0.00 | 1.0E+00 | 1.0E+00 | 0.003 | 0.002 | 0.60 | 3.9E-03  | 2.9E-02  |

Estimated odds ratio (OR) by Fisher's exact test, their p-values and adjusted p values by Holm's method are shown. Significant increase or decrease in prevalence with adjusted p <0.05 is indicated in bold.

**Table S7.** NNRTI-associated SDRMs and candidate SDRMs: Comparisons of prevalence in RTI-naïve and NNRTI-experienced persons before and after 2009 using Fisher's exact test.

| Pos | AA | SDRM      | RTI-Naive                   |                             |      |         |               | NNRTI-Experienced           |                             |      |          |                 |
|-----|----|-----------|-----------------------------|-----------------------------|------|---------|---------------|-----------------------------|-----------------------------|------|----------|-----------------|
|     |    |           | % in<br><2009<br>(n=54,910) | % in<br>≥2009<br>(n=45,940) | OR   | p       | Adjusted<br>p | % in<br><2009<br>(n=27,755) | % in<br>≥2009<br>(n=22,219) | OR   | p        | Adjusted<br>p   |
| 100 | I  | SDRM      | 0.000                       | 0.000                       | 0.15 | 2.2E-03 | 3.5E-02       | 0.045                       | 0.035                       | 0.77 | 5.2E-09  | <b>7.7E-08</b>  |
| 101 | E  | SDRM      | 0.001                       | 0.002                       | 1.35 | 3.2E-02 | 4.2E-01       | 0.072                       | 0.093                       | 1.34 | 5.3E-19  | <b>9.0E-18</b>  |
| 101 | P  | SDRM      | 0.000                       | 0.000                       | 1.20 | 7.9E-01 | 1.0E+00       | 0.017                       | 0.014                       | 0.81 | 1.8E-03  | <b>1.8E-02</b>  |
| 103 | N  | SDRM      | 0.013                       | 0.016                       | 1.24 | 2.2E-05 | 4.2E-04       | 0.358                       | 0.356                       | 0.99 | 3.4E-01  | 1.0E+00         |
| 103 | S  | SDRM      | 0.000                       | 0.001                       | 1.87 | 3.4E-02 | 4.2E-01       | 0.020                       | 0.023                       | 1.16 | 7.6E-03  | 6.1E-02         |
| 106 | A  | SDRM      | 0.000                       | 0.000                       | 0.51 | 1.2E-01 | 9.6E-01       | 0.018                       | 0.014                       | 0.76 | 7.1E-05  | <b>9.2E-04</b>  |
| 106 | M  | SDRM      | 0.000                       | 0.001                       | 3.93 | 5.3E-04 | 9.5E-03       | 0.026                       | 0.091                       | 3.75 | 6.0E-224 | <b>1.1E-222</b> |
| 179 | F  | SDRM      | 0.000                       | 0.000                       | 0.30 | 9.4E-02 | 8.4E-01       | 0.003                       | 0.002                       | 0.76 | 8.7E-02  | 5.7E-01         |
| 181 | C  | SDRM      | 0.002                       | 0.002                       | 1.05 | 4.2E-01 | 1.0E+00       | 0.179                       | 0.181                       | 1.01 | 3.3E-01  | 1.0E+00         |
| 181 | I  | SDRM      | 0.000                       | 0.000                       | 2.39 | 2.6E-01 | 1.0E+00       | 0.008                       | 0.006                       | 0.73 | 2.4E-03  | <b>2.2E-02</b>  |
| 181 | V  | SDRM      | 0.000                       | 0.000                       | Inf  | 4.6E-01 | 1.0E+00       | 0.005                       | 0.007                       | 1.43 | 1.2E-03  | <b>1.3E-02</b>  |
| 188 | C  | SDRM      | 0.000                       | 0.000                       | 0.80 | 3.9E-01 | 1.0E+00       | 0.007                       | 0.010                       | 1.44 | 2.0E-04  | <b>2.4E-03</b>  |
| 188 | H  | SDRM      | 0.000                       | 0.000                       | 0.32 | 2.5E-02 | 3.5E-01       | 0.008                       | 0.007                       | 0.88 | 1.4E-01  | 6.9E-01         |
| 188 | L  | SDRM      | 0.000                       | 0.001                       | 1.56 | 5.5E-02 | 5.7E-01       | 0.045                       | 0.044                       | 0.98 | 3.7E-01  | 1.0E+00         |
| 190 | A  | SDRM      | 0.002                       | 0.002                       | 1.54 | 1.5E-03 | 2.6E-02       | 0.145                       | 0.146                       | 1.01 | 4.0E-01  | 1.0E+00         |
| 190 | E  | SDRM      | 0.000                       | 0.001                       | 2.72 | 3.3E-03 | 4.9E-02       | 0.005                       | 0.006                       | 1.20 | 8.2E-02  | 5.7E-01         |
| 190 | S  | SDRM      | 0.000                       | 0.000                       | 2.39 | 1.2E-01 | 9.6E-01       | 0.027                       | 0.033                       | 1.24 | 2.1E-05  | <b>2.9E-04</b>  |
| 225 | H  | SDRM      | 0.000                       | 0.000                       | 0.36 | 5.1E-02 | 5.7E-01       | 0.043                       | 0.074                       | 1.79 | 6.1E-51  | <b>1.1E-49</b>  |
| 230 | L  | SDRM      | 0.000                       | 0.000                       | 1.17 | 4.9E-01 | 1.0E+00       | 0.015                       | 0.026                       | 1.67 | 9.7E-16  | <b>1.6E-14</b>  |
| 101 | H  | Candidate | 0.000                       | 0.000                       | Inf  | 4.3E-02 | 6.5E-01       | 0.013                       | 0.013                       | 1.00 | 5.2E-01  | 1.0E+00         |
| 101 | N  | Candidate | 0.000                       | 0.000                       | 1.20 | 4.2E-01 | 1.0E+00       | 0.005                       | 0.007                       | 1.31 | 1.3E-02  | 1.0E-01         |
| 101 | T  | Candidate | 0.000                       | 0.000                       | 1.59 | 2.7E-01 | 1.0E+00       | 0.004                       | 0.002                       | 0.64 | 5.3E-03  | 5.8E-02         |

[illegible]

**Table S8.** PI-associated SDRMs and candidate SDRMs: Comparisons of prevalence in PI-naïve and PI-experienced persons before and after 2009 using Fisher's exact test.

| Pos | AA | SDRM | PII-Naive                   |                             |      |         |               | PI-Experienced              |                             |      |          |                 |
|-----|----|------|-----------------------------|-----------------------------|------|---------|---------------|-----------------------------|-----------------------------|------|----------|-----------------|
|     |    |      | % in<br><2009<br>(n=61,067) | % in<br>≥2009<br>(n=54,813) | OR   | p       | Adjusted<br>p | % in<br><2009<br>(n=22,266) | % in<br>≥2009<br>(n=10,534) | OR   | p        | Adjusted<br>p   |
| 23  | I  | SDRM | 0.000                       | 0.000                       | 1.00 | 5.7E-01 | 1.0E+00       | 0.013                       | 0.011                       | 0.80 | 2.1E-02  | 8.5E-02         |
| 24  | I  | SDRM | 0.000                       | 0.000                       | 0.26 | 1.9E-02 | 6.9E-01       | 0.056                       | 0.025                       | 0.43 | 2.6E-40  | <b>8.2E-39</b>  |
| 30  | N  | SDRM | 0.000                       | 0.000                       | 1.25 | 4.1E-01 | 1.0E+00       | 0.062                       | 0.024                       | 0.38 | 6.4E-54  | <b>2.0E-52</b>  |
| 32  | I  | SDRM | 0.000                       | 0.000                       | 0.37 | 1.0E-01 | 1.0E+00       | 0.050                       | 0.025                       | 0.49 | 1.2E-27  | <b>2.7E-26</b>  |
| 46  | I  | SDRM | 0.003                       | 0.003                       | 1.31 | 8.0E-03 | 3.0E-01       | 0.212                       | 0.126                       | 0.54 | 2.9E-82  | <b>9.7E-81</b>  |
| 46  | L  | SDRM | 0.003                       | 0.004                       | 1.20 | 4.2E-02 | 1.0E+00       | 0.092                       | 0.034                       | 0.35 | 4.5E-88  | <b>1.6E-86</b>  |
| 47  | A  | SDRM | 0.000                       | 0.000                       | 0.00 | 1.0E+00 | 1.0E+00       | 0.004                       | 0.010                       | 2.43 | 7.8E-10  | <b>1.2E-08</b>  |
| 47  | V  | SDRM | 0.000                       | 0.000                       | 0.77 | 3.5E-01 | 1.0E+00       | 0.045                       | 0.020                       | 0.42 | 4.7E-34  | <b>1.3E-32</b>  |
| 48  | M  | SDRM | 0.000                       | 0.000                       | 0.00 | 1.0E+00 | 1.0E+00       | 0.005                       | 0.002                       | 0.28 | 2.2E-08  | <b>3.0E-07</b>  |
| 48  | V  | SDRM | 0.000                       | 0.000                       | 0.00 | 1.0E+00 | 1.0E+00       | 0.037                       | 0.007                       | 0.18 | 1.0E-67  | <b>3.4E-66</b>  |
| 50  | L  | SDRM | 0.000                       | 0.000                       | 0.00 | 4.1E-02 | 1.0E+00       | 0.015                       | 0.025                       | 1.70 | 1.9E-10  | <b>3.0E-09</b>  |
| 50  | V  | SDRM | 0.000                       | 0.000                       | 0.28 | 7.6E-02 | 1.0E+00       | 0.018                       | 0.012                       | 0.66 | 1.9E-05  | <b>1.9E-04</b>  |
| 53  | L  | SDRM | 0.000                       | 0.000                       | 0.72 | 2.3E-01 | 1.0E+00       | 0.059                       | 0.030                       | 0.49 | 7.3E-32  | <b>1.8E-30</b>  |
| 53  | Y  | SDRM | 0.000                       | 0.000                       | 2.23 | 3.4E-02 | 1.0E+00       | 0.004                       | 0.002                       | 0.35 | 9.9E-06  | <b>1.1E-04</b>  |
| 54  | A  | SDRM | 0.000                       | 0.000                       | 0.00 | 1.0E+00 | 1.0E+00       | 0.013                       | 0.004                       | 0.27 | 1.1E-18  | <b>2.4E-17</b>  |
| 54  | L  | SDRM | 0.000                       | 0.000                       | 0.56 | 2.5E-01 | 1.0E+00       | 0.030                       | 0.014                       | 0.45 | 3.4E-21  | <b>7.6E-20</b>  |
| 54  | M  | SDRM | 0.000                       | 0.000                       | 1.11 | 7.1E-01 | 1.0E+00       | 0.023                       | 0.006                       | 0.24 | 1.5E-35  | <b>4.4E-34</b>  |
| 54  | S  | SDRM | 0.000                       | 0.000                       | 0.00 | 1.0E+00 | 1.0E+00       | 0.007                       | 0.001                       | 0.21 | 1.1E-12  | <b>1.9E-11</b>  |
| 54  | T  | SDRM | 0.000                       | 0.000                       | 0.64 | 3.4E-01 | 1.0E+00       | 0.008                       | 0.002                       | 0.19 | 7.1E-16  | <b>1.4E-14</b>  |
| 54  | V  | SDRM | 0.000                       | 0.000                       | 1.67 | 3.1E-01 | 1.0E+00       | 0.231                       | 0.120                       | 0.46 | 1.2E-131 | <b>4.4E-130</b> |
| 73  | A  | SDRM | 0.000                       | 0.000                       | 1.11 | 6.5E-01 | 1.0E+00       | 0.006                       | 0.002                       | 0.34 | 8.1E-08  | <b>1.1E-06</b>  |
| 73  | C  | SDRM | 0.000                       | 0.000                       | 1.67 | 4.5E-01 | 1.0E+00       | 0.011                       | 0.003                       | 0.30 | 7.5E-15  | <b>1.4E-13</b>  |
| 73  | S  | SDRM | 0.000                       | 0.000                       | 1.67 | 1.1E-01 | 1.0E+00       | 0.083                       | 0.027                       | 0.31 | 4.6E-92  | <b>1.6E-90</b>  |

|    |   |           |       |       |       |         |         |       |       |      |          |                 |
|----|---|-----------|-------|-------|-------|---------|---------|-------|-------|------|----------|-----------------|
| 73 | T | SDRM      | 0.000 | 0.000 | 0.00  | 1.0E+00 | 1.0E+00 | 0.024 | 0.006 | 0.25 | 6.0E-35  | <b>1.7E-33</b>  |
| 76 | V | SDRM      | 0.000 | 0.000 | 1.34  | 4.3E-01 | 1.0E+00 | 0.033 | 0.033 | 1.00 | 4.9E-01  | 4.9E-01         |
| 82 | A | SDRM      | 0.000 | 0.000 | 0.96  | 5.1E-01 | 1.0E+00 | 0.220 | 0.122 | 0.49 | 2.7E-106 | <b>1.0E-104</b> |
| 82 | C | SDRM      | 0.000 | 0.000 | Inf   | 2.2E-01 | 1.0E+00 | 0.006 | 0.004 | 0.66 | 8.7E-03  | <b>4.3E-02</b>  |
| 82 | F | SDRM      | 0.000 | 0.000 | 12.25 | 1.8E-03 | 7.0E-02 | 0.018 | 0.011 | 0.59 | 1.9E-07  | <b>2.3E-06</b>  |
| 82 | L | SDRM      | 0.000 | 0.000 | 1.35  | 2.5E-01 | 1.0E+00 | 0.003 | 0.002 | 0.69 | 7.6E-02  | 2.3E-01         |
| 82 | M | SDRM      | 0.000 | 0.000 | Inf   | 2.2E-01 | 1.0E+00 | 0.003 | 0.004 | 1.28 | 1.2E-01  | 2.4E-01         |
| 82 | S | SDRM      | 0.000 | 0.000 | 0.56  | 5.4E-01 | 1.0E+00 | 0.013 | 0.005 | 0.40 | 6.0E-12  | <b>1.0E-10</b>  |
| 82 | T | SDRM      | 0.000 | 0.000 | 0.00  | 1.0E+00 | 1.0E+00 | 0.028 | 0.008 | 0.27 | 8.2E-38  | <b>2.5E-36</b>  |
| 83 | D | SDRM      | 0.000 | 0.000 | 1.62  | 1.5E-01 | 1.0E+00 | 0.009 | 0.006 | 0.69 | 4.1E-03  | <b>2.5E-02</b>  |
| 84 | A | SDRM      | 0.000 | 0.000 | 0.00  | 1.0E+00 | 1.0E+00 | 0.001 | 0.000 | 0.08 | 2.8E-04  | <b>1.9E-03</b>  |
| 84 | C | SDRM      | 0.000 | 0.000 | 0.00  | 1.0E+00 | 1.0E+00 | 0.001 | 0.000 | 0.00 | 6.2E-05  | <b>5.0E-04</b>  |
| 84 | V | SDRM      | 0.000 | 0.000 | 1.98  | 7.0E-02 | 1.0E+00 | 0.122 | 0.038 | 0.28 | 6.8E-151 | <b>2.7E-149</b> |
| 85 | V | SDRM      | 0.002 | 0.002 | 0.95  | 4.1E-01 | 1.0E+00 | 0.046 | 0.021 | 0.44 | 6.9E-33  | <b>1.8E-31</b>  |
| 88 | D | SDRM      | 0.000 | 0.000 | 0.67  | 2.3E-01 | 1.0E+00 | 0.054 | 0.027 | 0.50 | 3.4E-29  | <b>8.0E-28</b>  |
| 88 | S | SDRM      | 0.000 | 0.000 | 0.00  | 1.3E-04 | 5.1E-03 | 0.016 | 0.010 | 0.64 | 2.1E-05  | <b>1.9E-04</b>  |
| 90 | M | SDRM      | 0.002 | 0.002 | 0.97  | 4.2E-01 | 1.0E+00 | 0.296 | 0.096 | 0.25 | 0.0E+00  | <b>0.0E+00</b>  |
| 10 | F | Candidate | 0.002 | 0.002 | 1.01  | 4.9E-01 | 1.0E+00 | 0.086 | 0.067 | 0.76 | 1.5E-09  | <b>2.0E-08</b>  |
| 10 | R | Candidate | 0.000 | 0.000 | 0.74  | 3.8E-01 | 1.0E+00 | 0.004 | 0.002 | 0.59 | 1.1E-02  | <b>4.2E-02</b>  |
| 11 | L | Candidate | 0.000 | 0.000 | 0.67  | 1.4E-01 | 1.0E+00 | 0.007 | 0.002 | 0.36 | 2.7E-07  | <b>2.7E-06</b>  |
| 20 | T | Candidate | 0.001 | 0.001 | 0.91  | 3.4E-01 | 1.0E+00 | 0.053 | 0.041 | 0.77 | 1.8E-06  | <b>1.6E-05</b>  |
| 24 | F | Candidate | 0.000 | 0.000 | 0.15  | 2.1E-05 | 3.6E-04 | 0.006 | 0.003 | 0.47 | 5.0E-05  | <b>3.0E-04</b>  |
| 34 | Q | Candidate | 0.001 | 0.001 | 1.01  | 5.2E-01 | 1.0E+00 | 0.026 | 0.013 | 0.49 | 1.8E-15  | <b>2.7E-14</b>  |
| 41 | T | Candidate | 0.000 | 0.000 | 1.11  | 4.0E-01 | 1.0E+00 | 0.001 | 0.001 | 1.27 | 3.2E-01  | 5.4E-01         |
| 43 | T | Candidate | 0.001 | 0.001 | 0.92  | 3.4E-01 | 1.0E+00 | 0.056 | 0.030 | 0.52 | 3.9E-27  | <b>6.6E-26</b>  |
| 46 | V | Candidate | 0.000 | 0.001 | 1.44  | 9.4E-02 | 1.0E+00 | 0.005 | 0.004 | 0.84 | 1.8E-01  | 5.4E-01         |
| 48 | A | Candidate | 0.000 | 0.000 | 2.23  | 4.6E-01 | 1.0E+00 | 0.005 | 0.002 | 0.36 | 9.4E-06  | <b>7.5E-05</b>  |
| 66 | V | Candidate | 0.001 | 0.001 | 0.87  | 2.8E-01 | 1.0E+00 | 0.011 | 0.004 | 0.40 | 4.5E-10  | <b>6.3E-09</b>  |
| 71 | I | Candidate | 0.001 | 0.001 | 1.34  | 7.6E-02 | 1.0E+00 | 0.032 | 0.017 | 0.51 | 4.4E-17  | <b>7.0E-16</b>  |
| 71 | L | Candidate | 0.000 | 0.000 | 0.00  | 2.8E-01 | 1.0E+00 | 0.004 | 0.002 | 0.58 | 7.7E-03  | <b>3.8E-02</b>  |



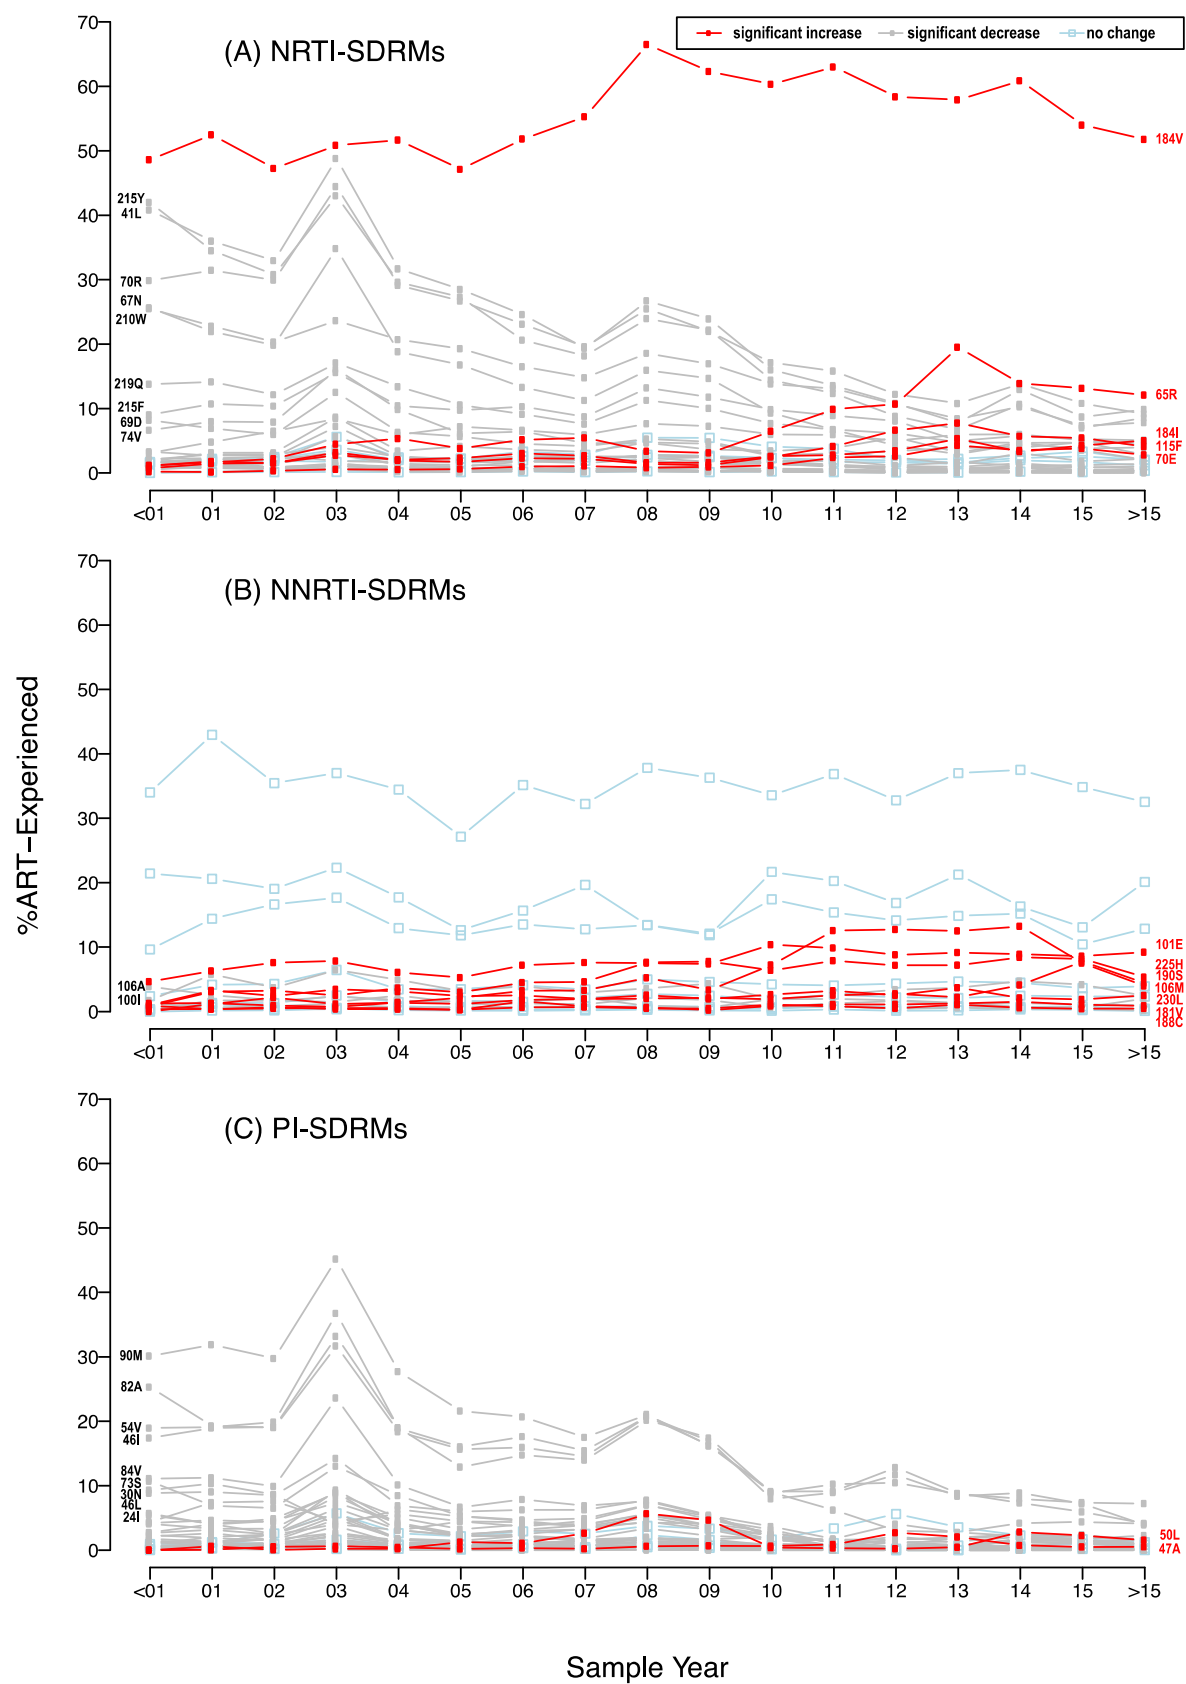

**Figure S1.** Yearly prevalence of (A) NRTI-SDRMs in NRTI-experienced persons, (B) NNRTI-SDRMs in NNRTI-experienced persons and (C) PI-SDRMs in PI-experienced persons. SDRMs significantly increased in prevalence are shown in red and indicated in red font on the right of the plotted lines. SDRMs significantly decreased in prevalence are shown in grey and indicated in black font on the left of the plotted lines. SDRMs did not change significantly in prevalence are shown in light blue. For SDRMs that decreased with a very low overall prevalence or did not change in prevalence, the labels are not shown. Full lists of NRTI-SDRMs, NNRTI-SDRMs and PI-SDRMs according to the change in prevalence are shown in Table 1, 3, and 5, respectively.

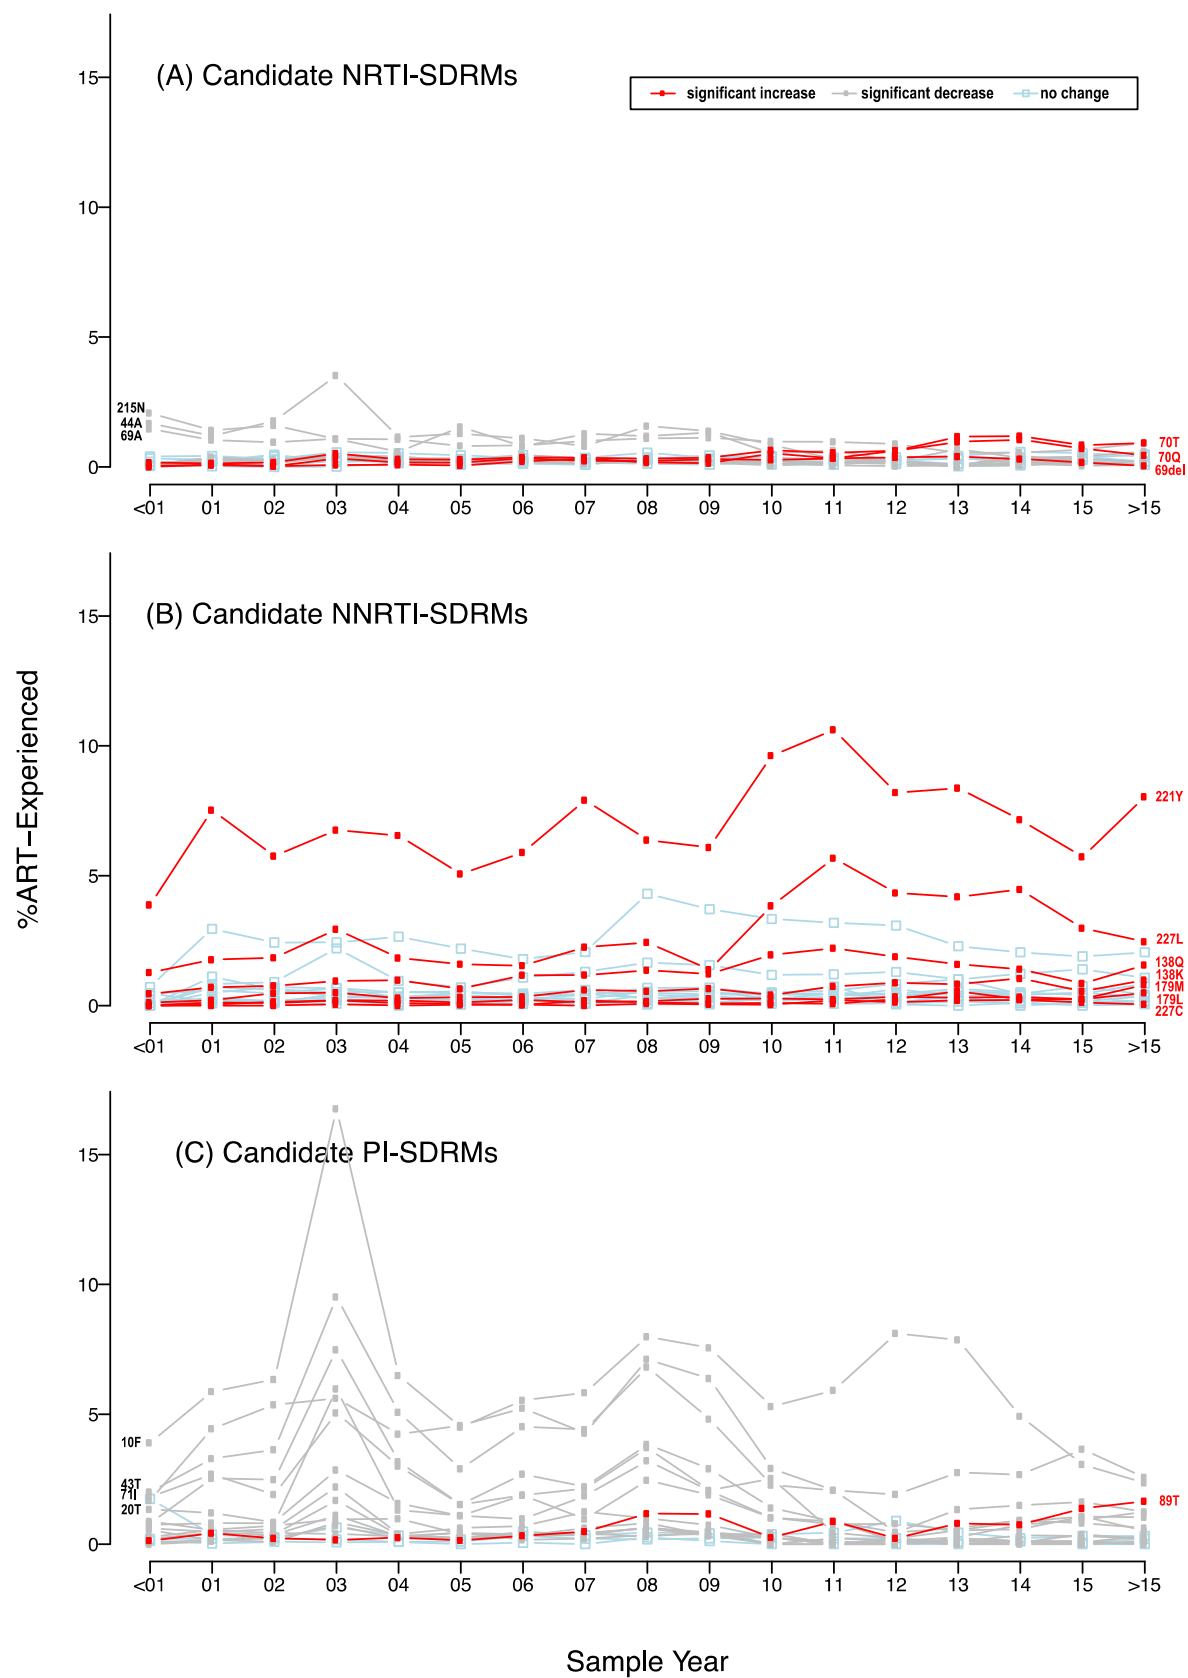

**Figure S2.** Yearly prevalence of (A) candidate NRTI-SDRMs in NRTI-experienced persons, (B) candidate NNRTI-SDRMs in NNRTI-experienced persons and (C) candidate PI-SDRMs in PI-experienced persons. Candidate SDRMs significantly increased in prevalence are shown in red and indicated in red font on the right of the plotted lines. Candidate SDRMs significantly decreased in prevalence are shown in grey and indicated in black font on the left of the plotted lines. Candidate SDRMs did not change significantly in prevalence are shown in light blue. For candidate SDRMs that decreased with a very low overall prevalence or did not change in prevalence, the labels are not shown. Full lists of candidate NRTI-SDRMs, NNRTI-SDRMs and PI-SDRMs according to the change in prevalence are shown in Table 2, 4, and 6, respectively.
